# Supplementary material for: Total synthesis of asperlicin C, circumdatin F, demethylbenzomalvin A, demethoxycircumdatin H, sclerotigenin, and other fused quinazolinones
Source: Royal Society of Chemistry journal article supplement (doi:10.1039/b910545j), 2009-11-05

## Supporting Information

### **Total Synthesis of Asperlicin C, Circumdatin F, Demethylbenzomalvin A, Demethoxycircumdatin H, Sclerotigenin, and Other Fused Quinazolinones**

Ming-Chung Tseng,<sup>†,‡</sup> Huei-Yun Yang,<sup>†</sup> and Yen-Ho Chu<sup>\*</sup>

Department of Chemistry and Biochemistry

National Chung Cheng University

168 University Road, Chia-Yi 621, Taiwan, ROC

<sup>†</sup> Both authors contribute equally to this work.

<sup>‡</sup> Present address: Institute of Molecular Biology, Academia Sinica, Nankang, Taipei, Taiwan

<sup>\*</sup> Corresponding author. Tel + 886 5 2428148; fax + 886 5 2721040; e-mail [cheyhc@ccu.edu.tw](mailto:cheyhc@ccu.edu.tw)

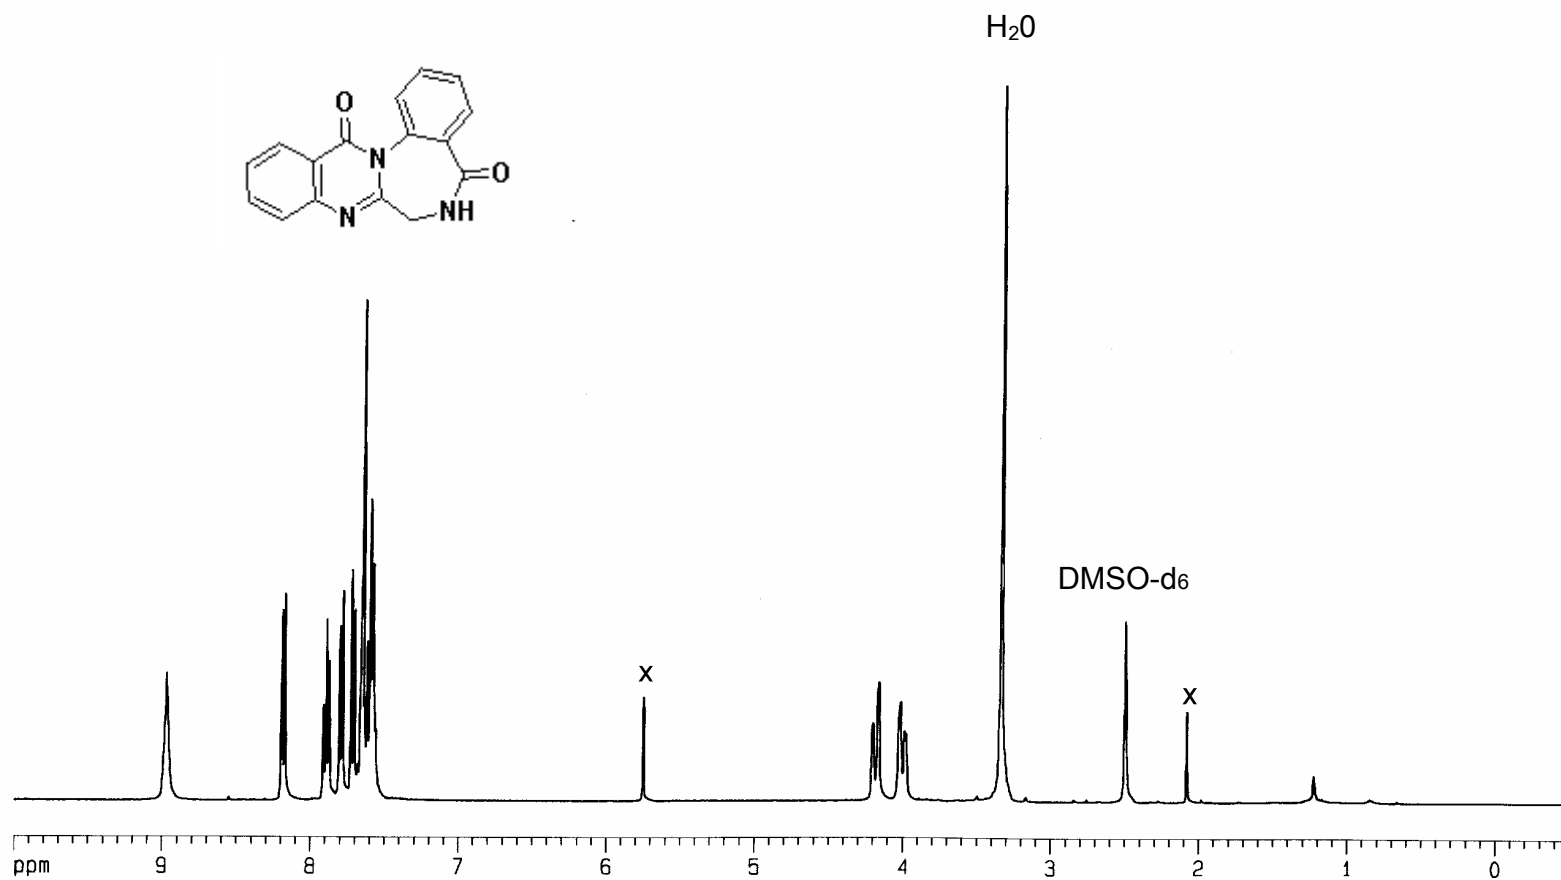

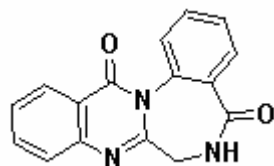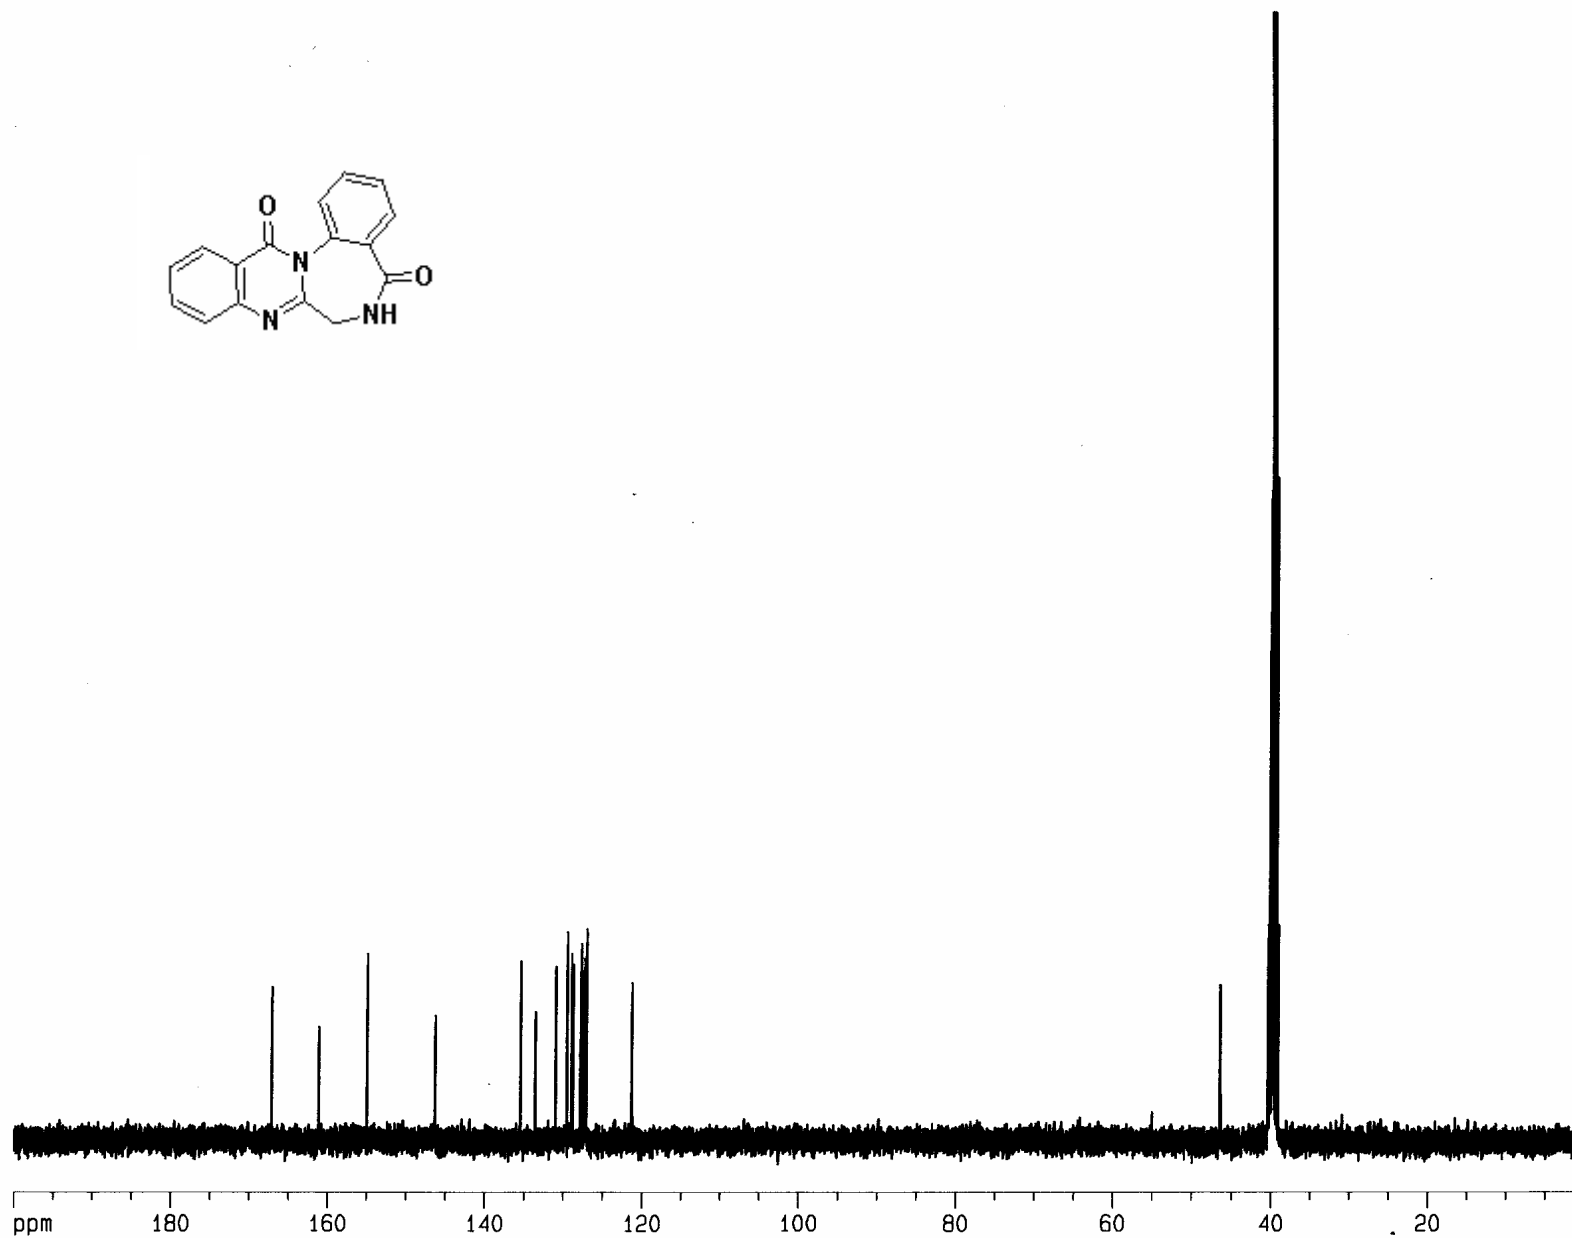

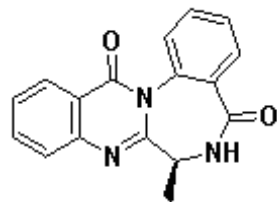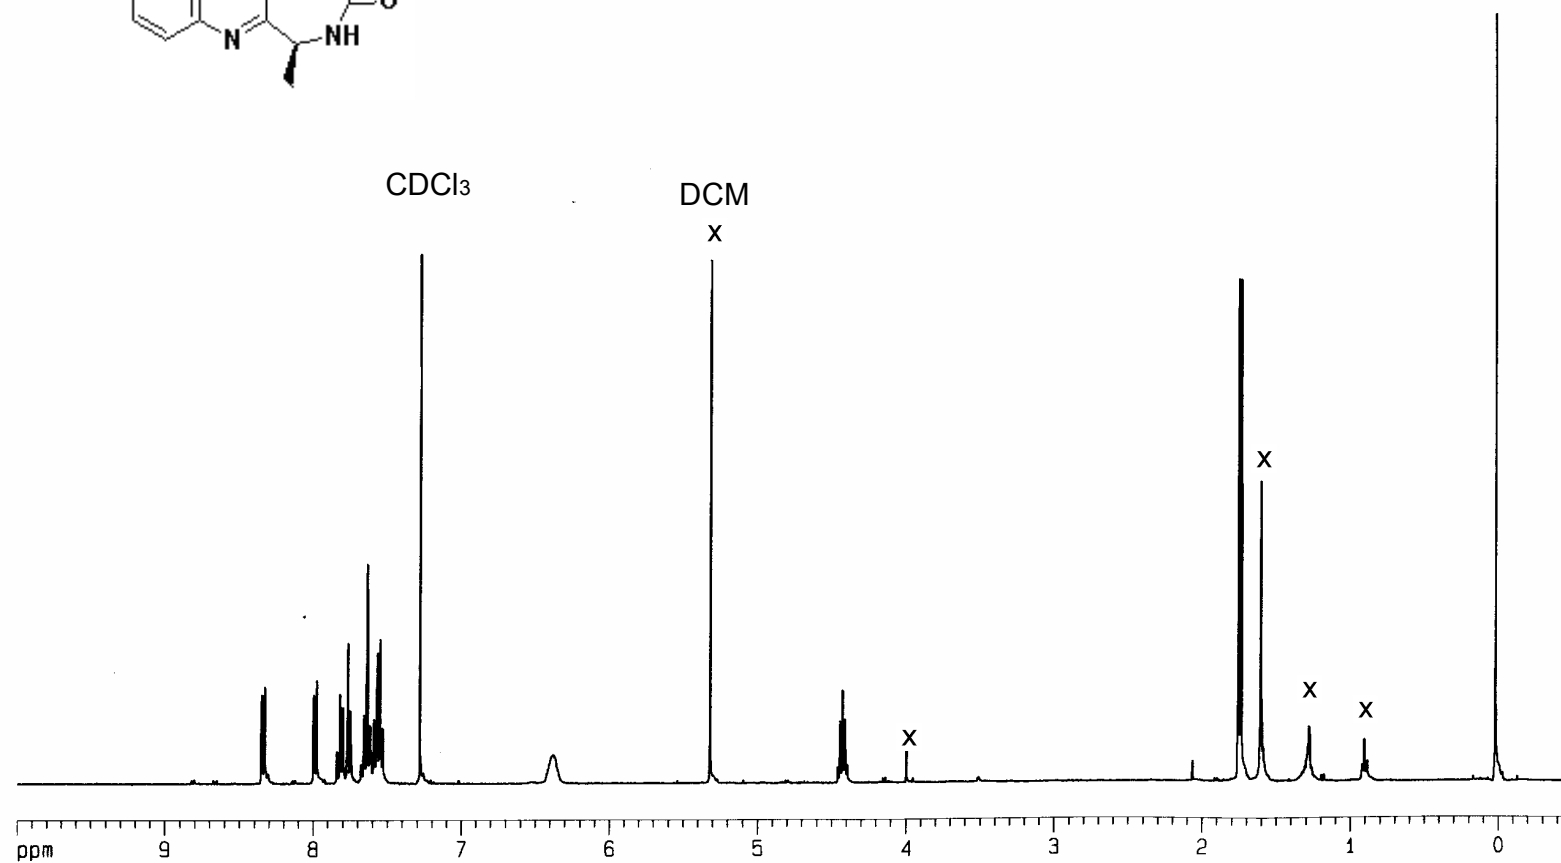

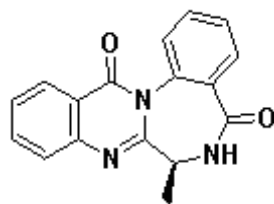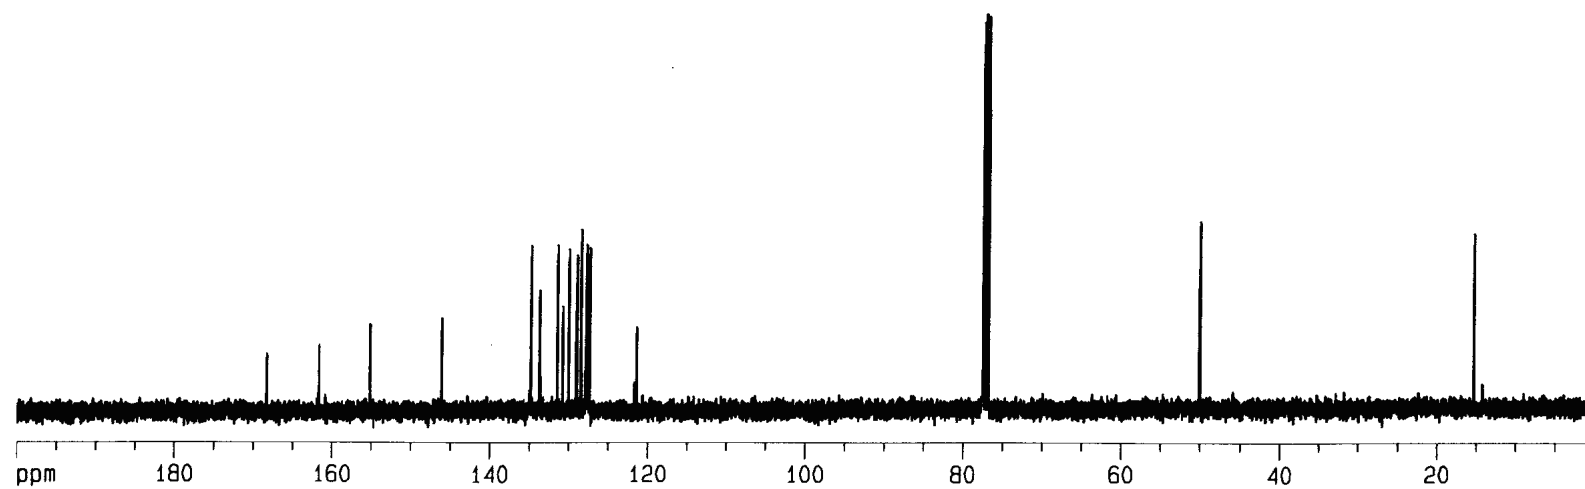

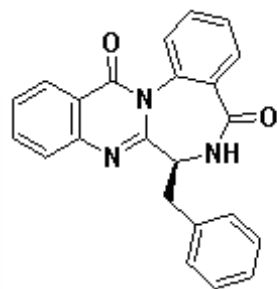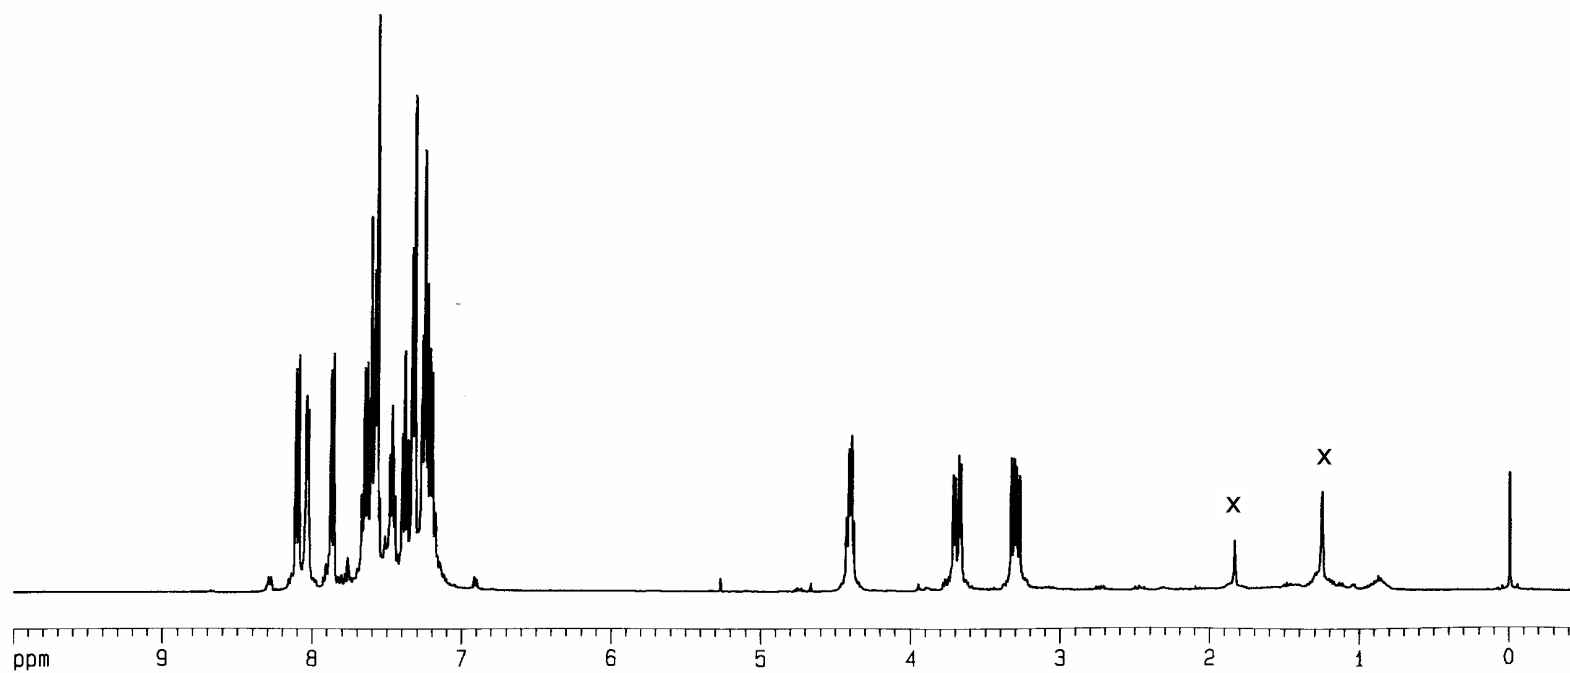

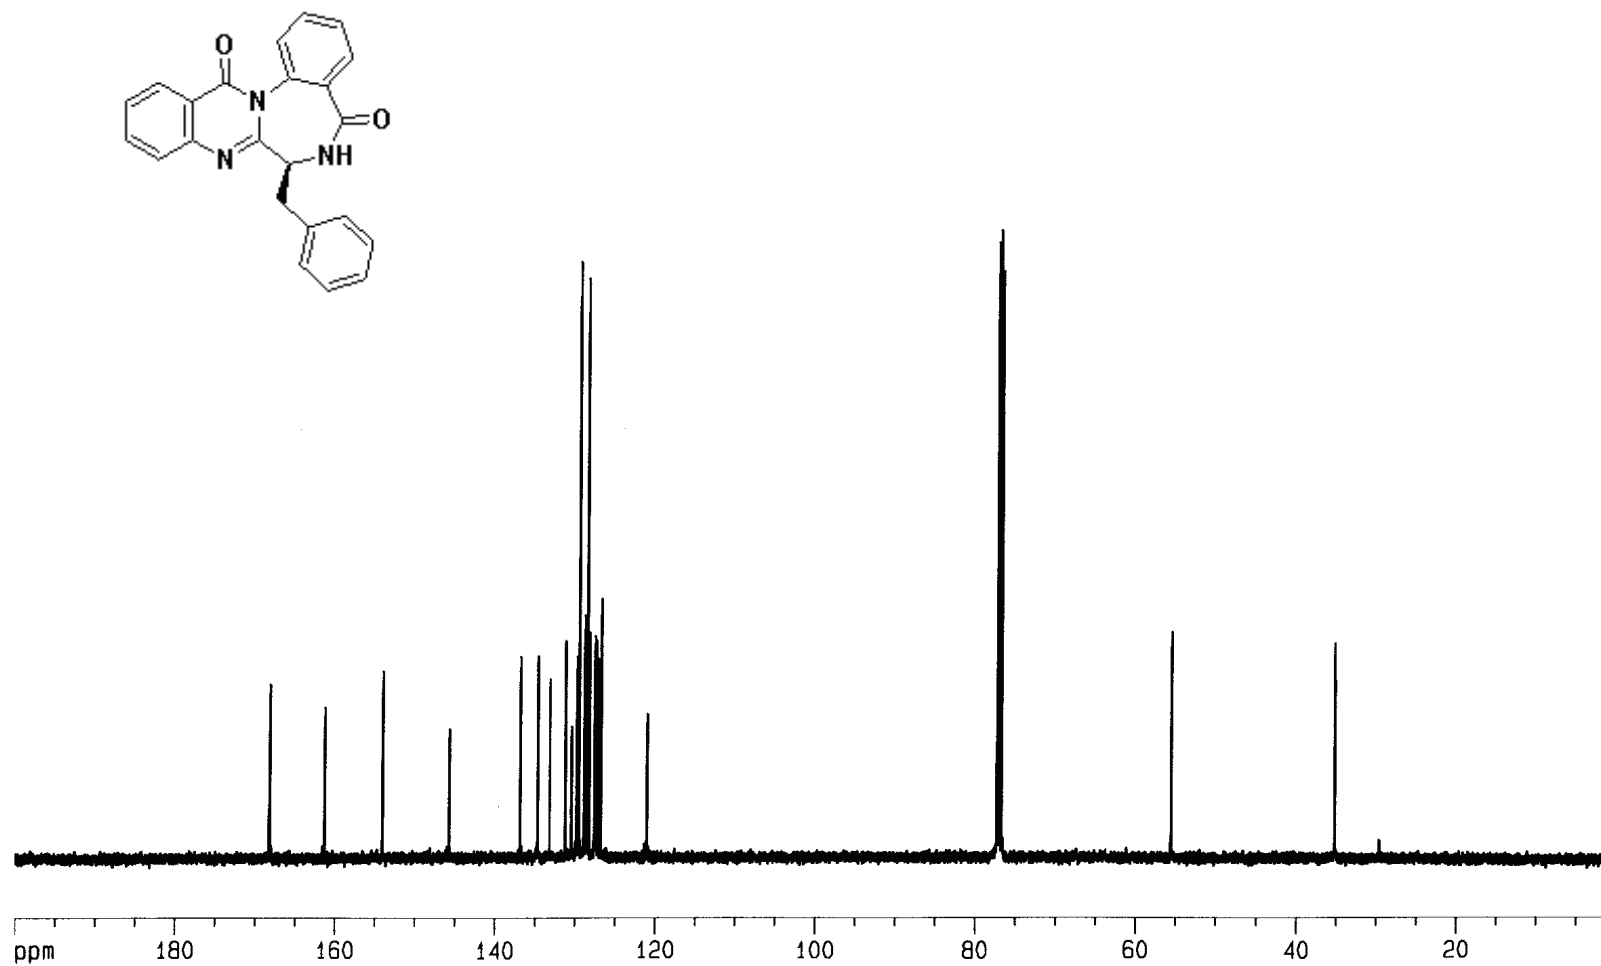

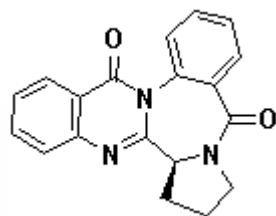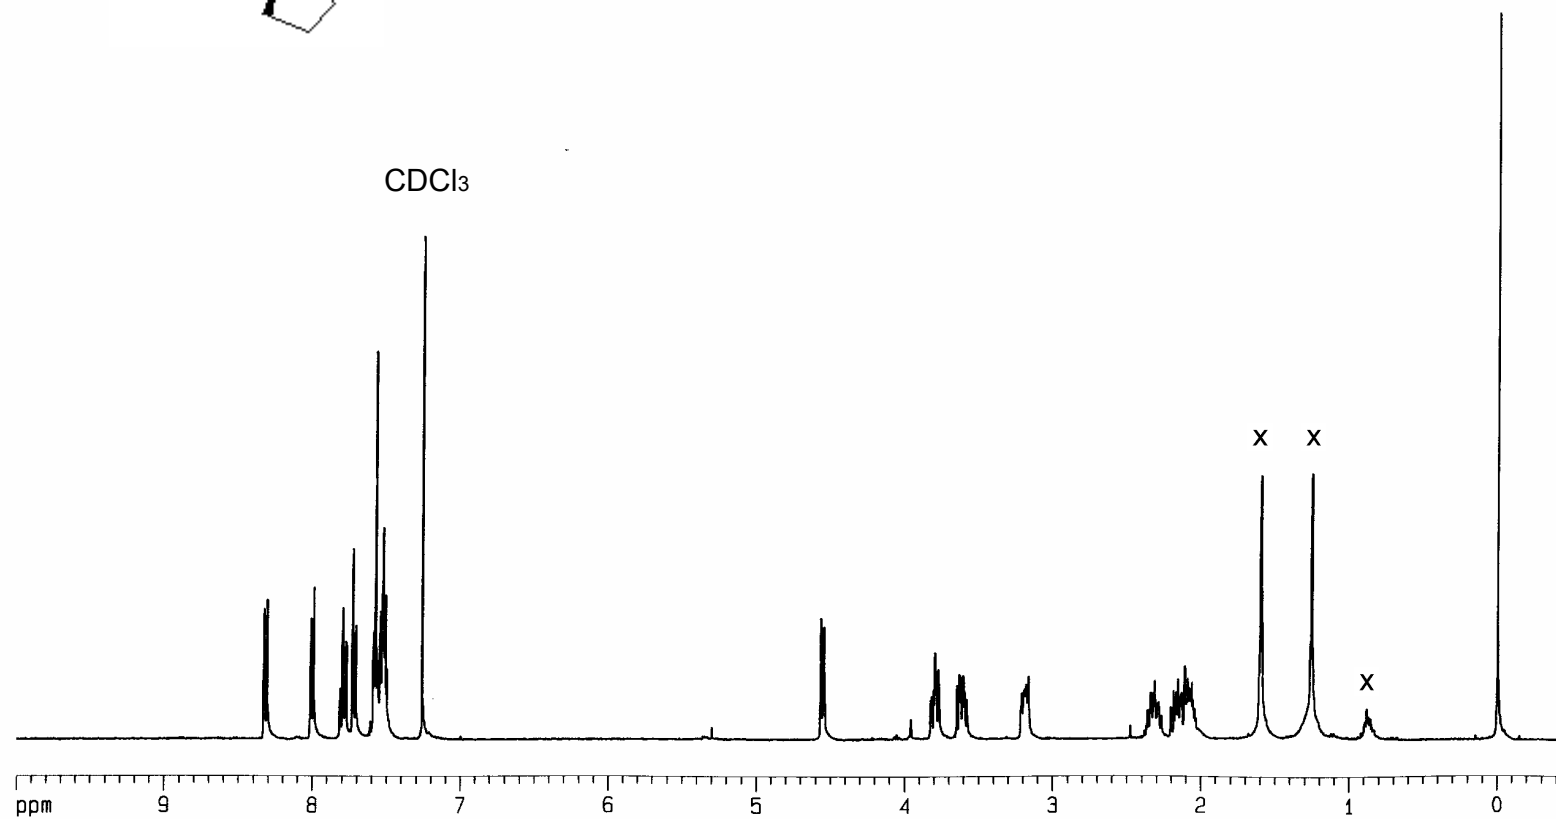

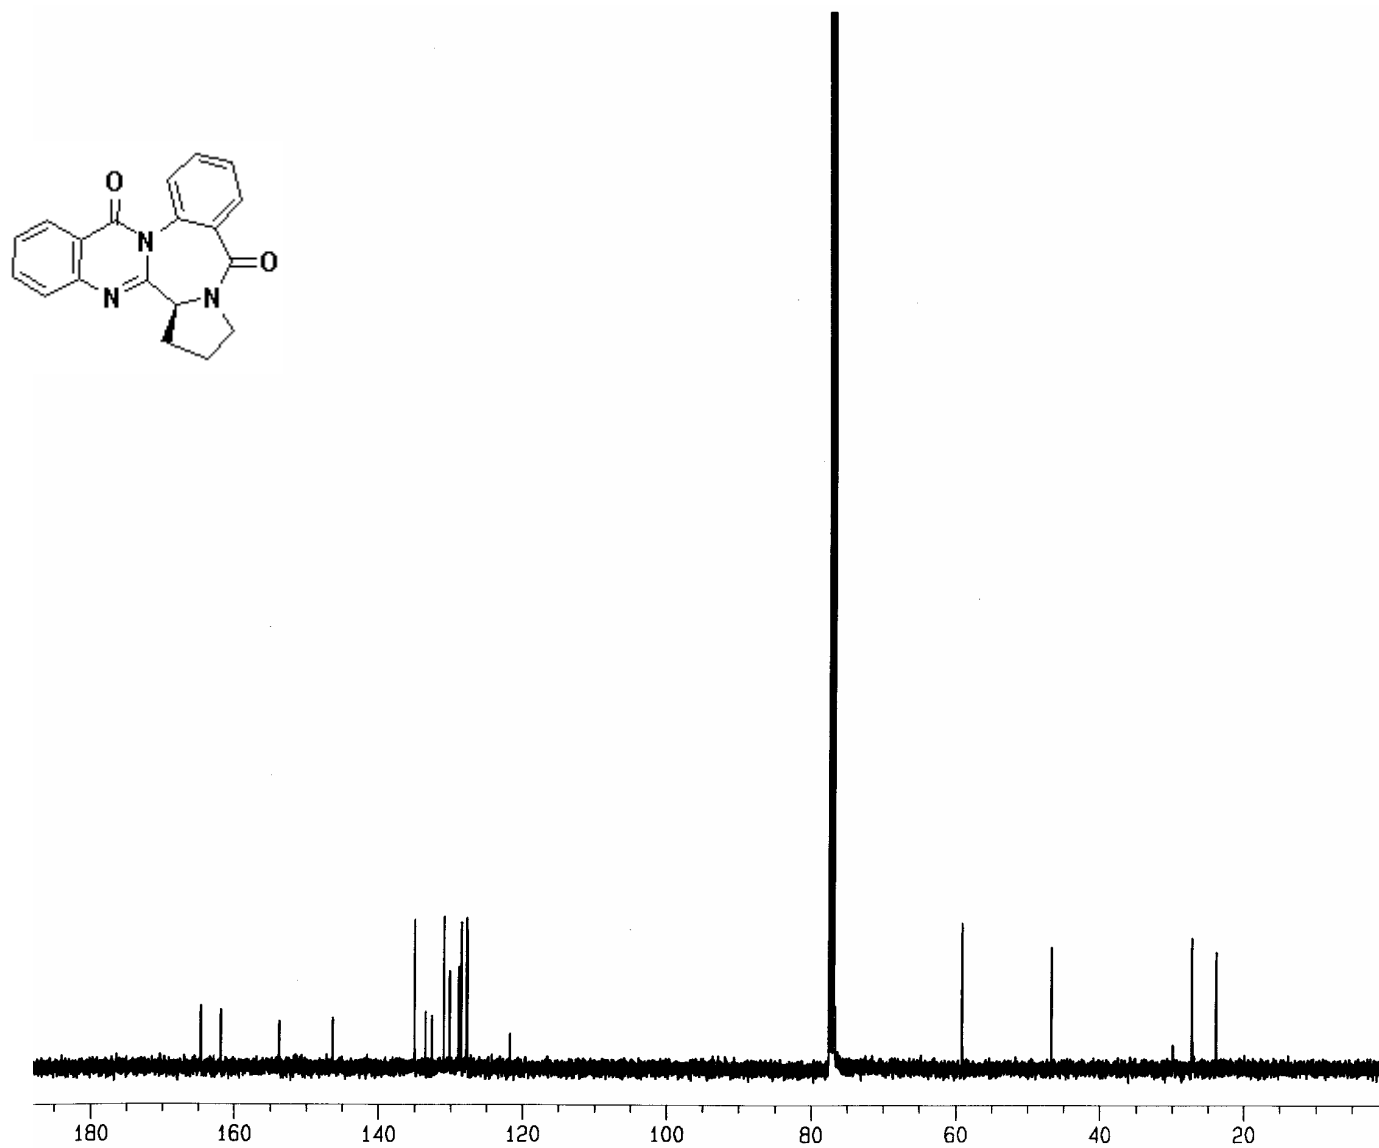

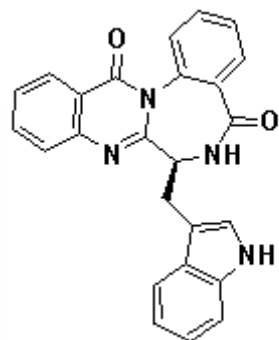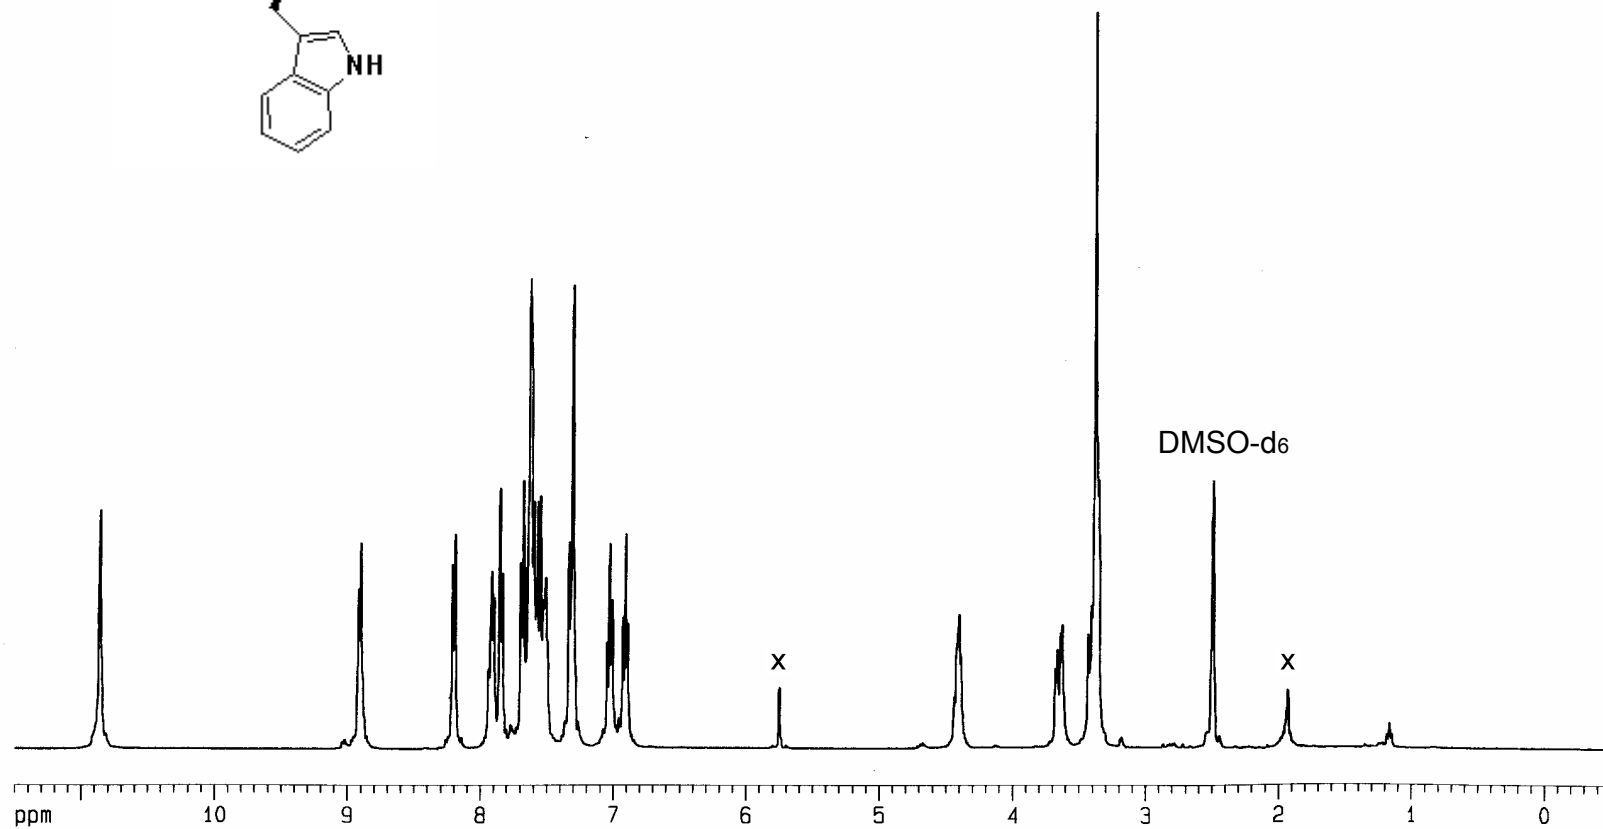

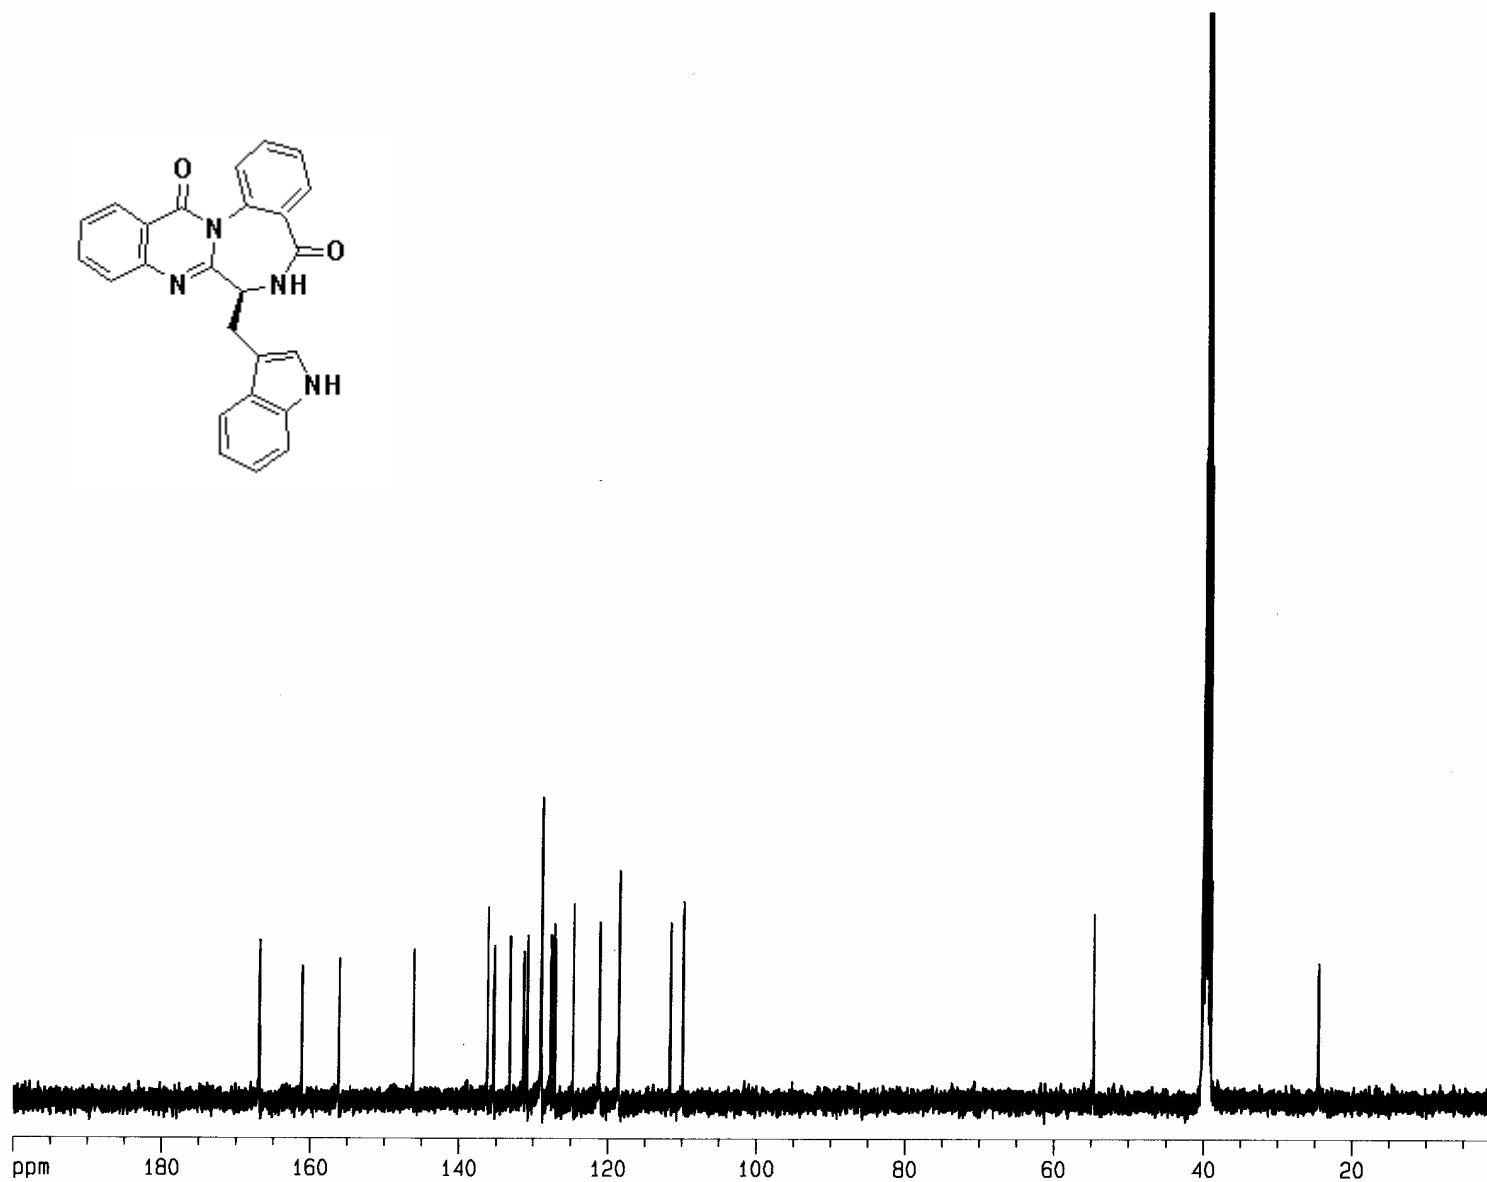

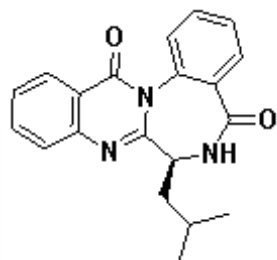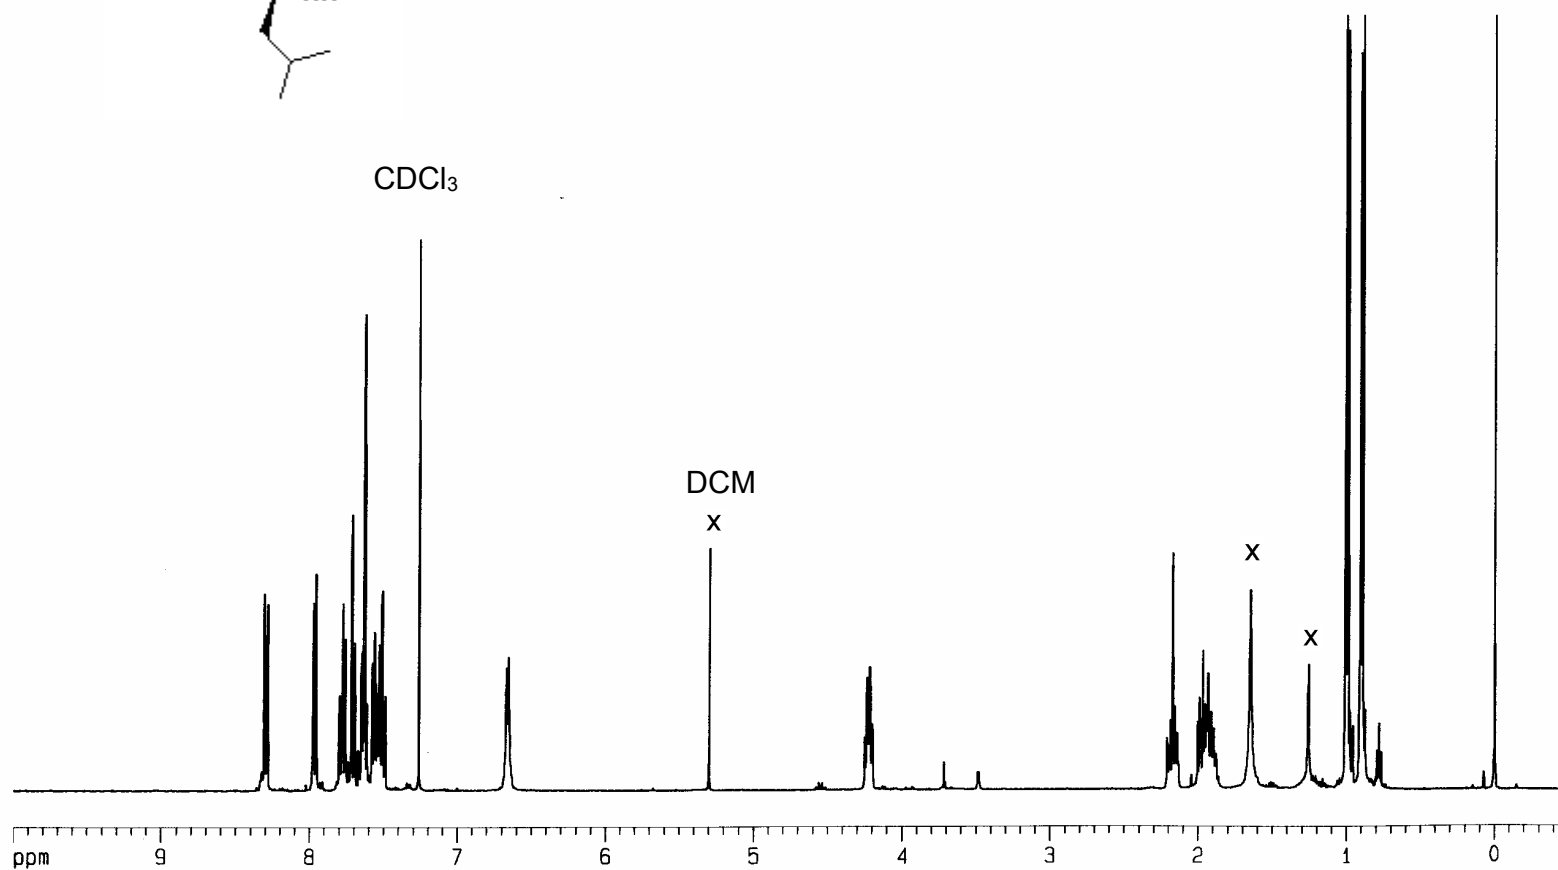

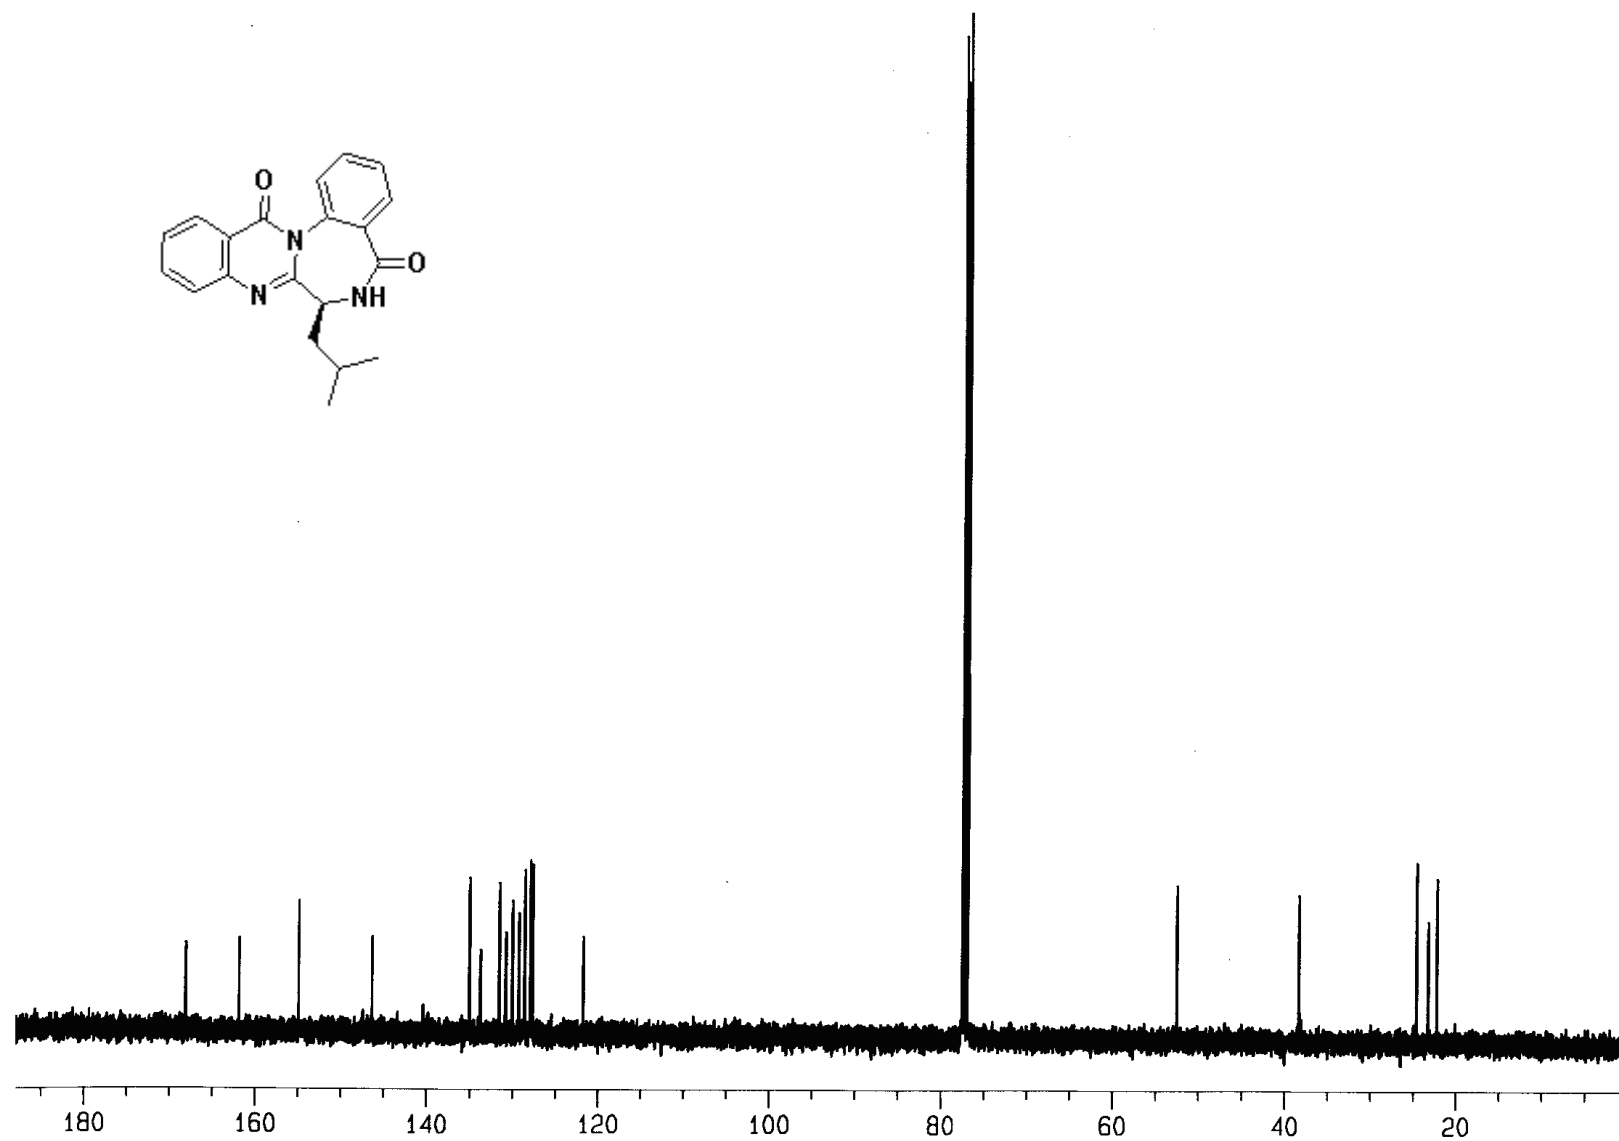

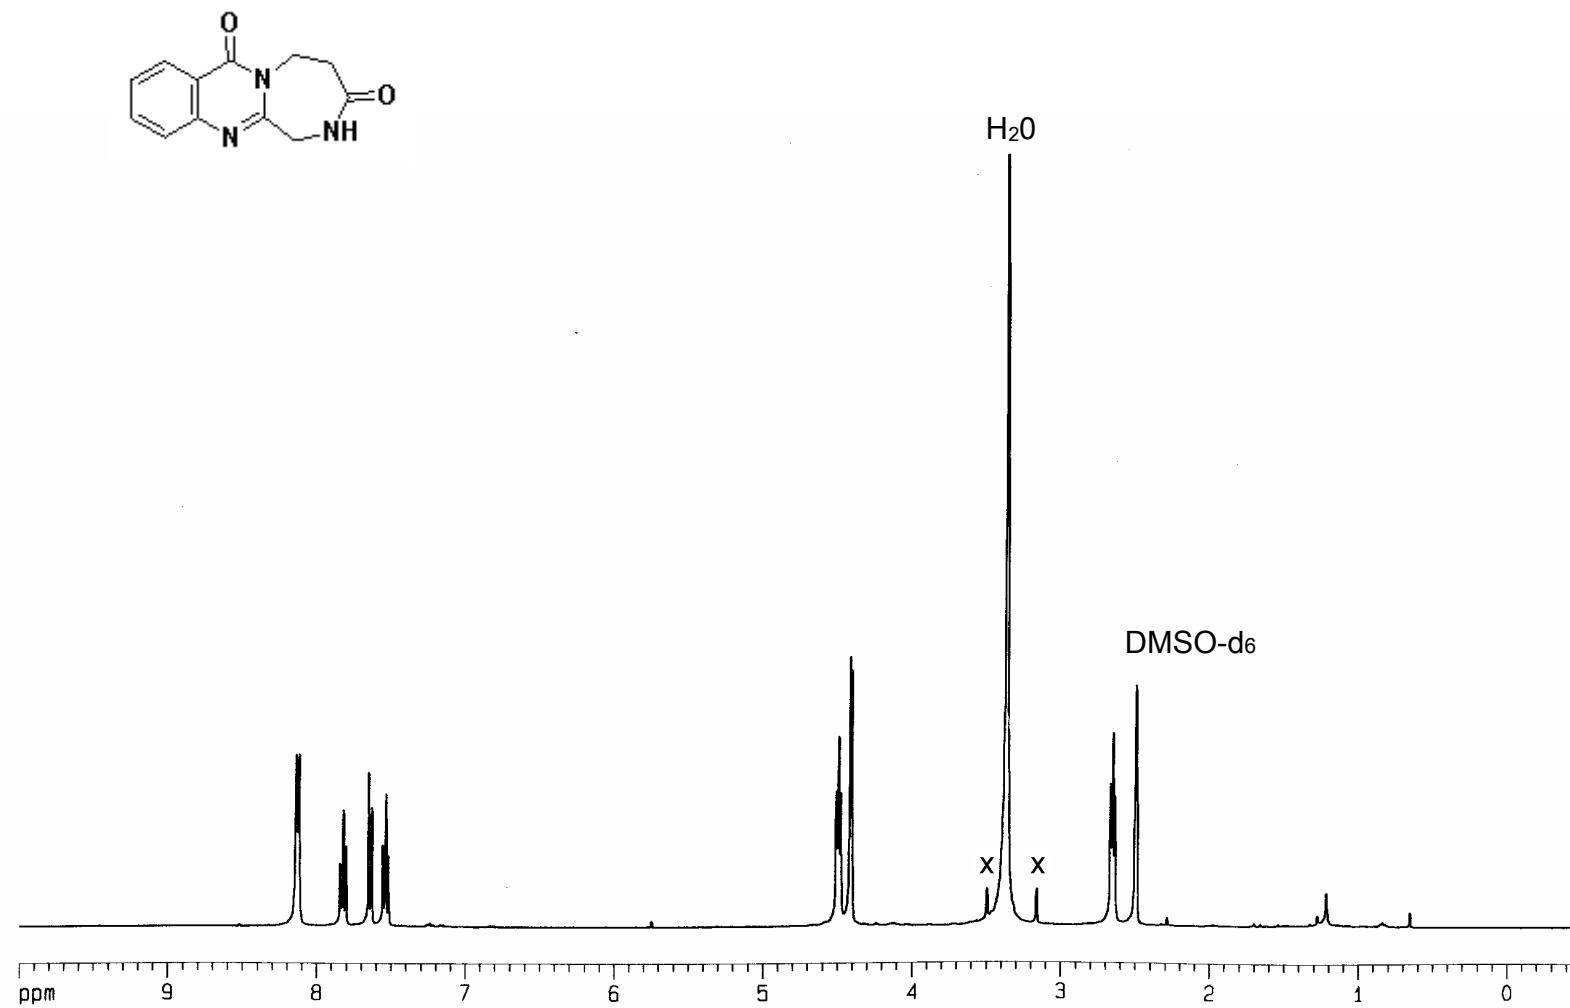

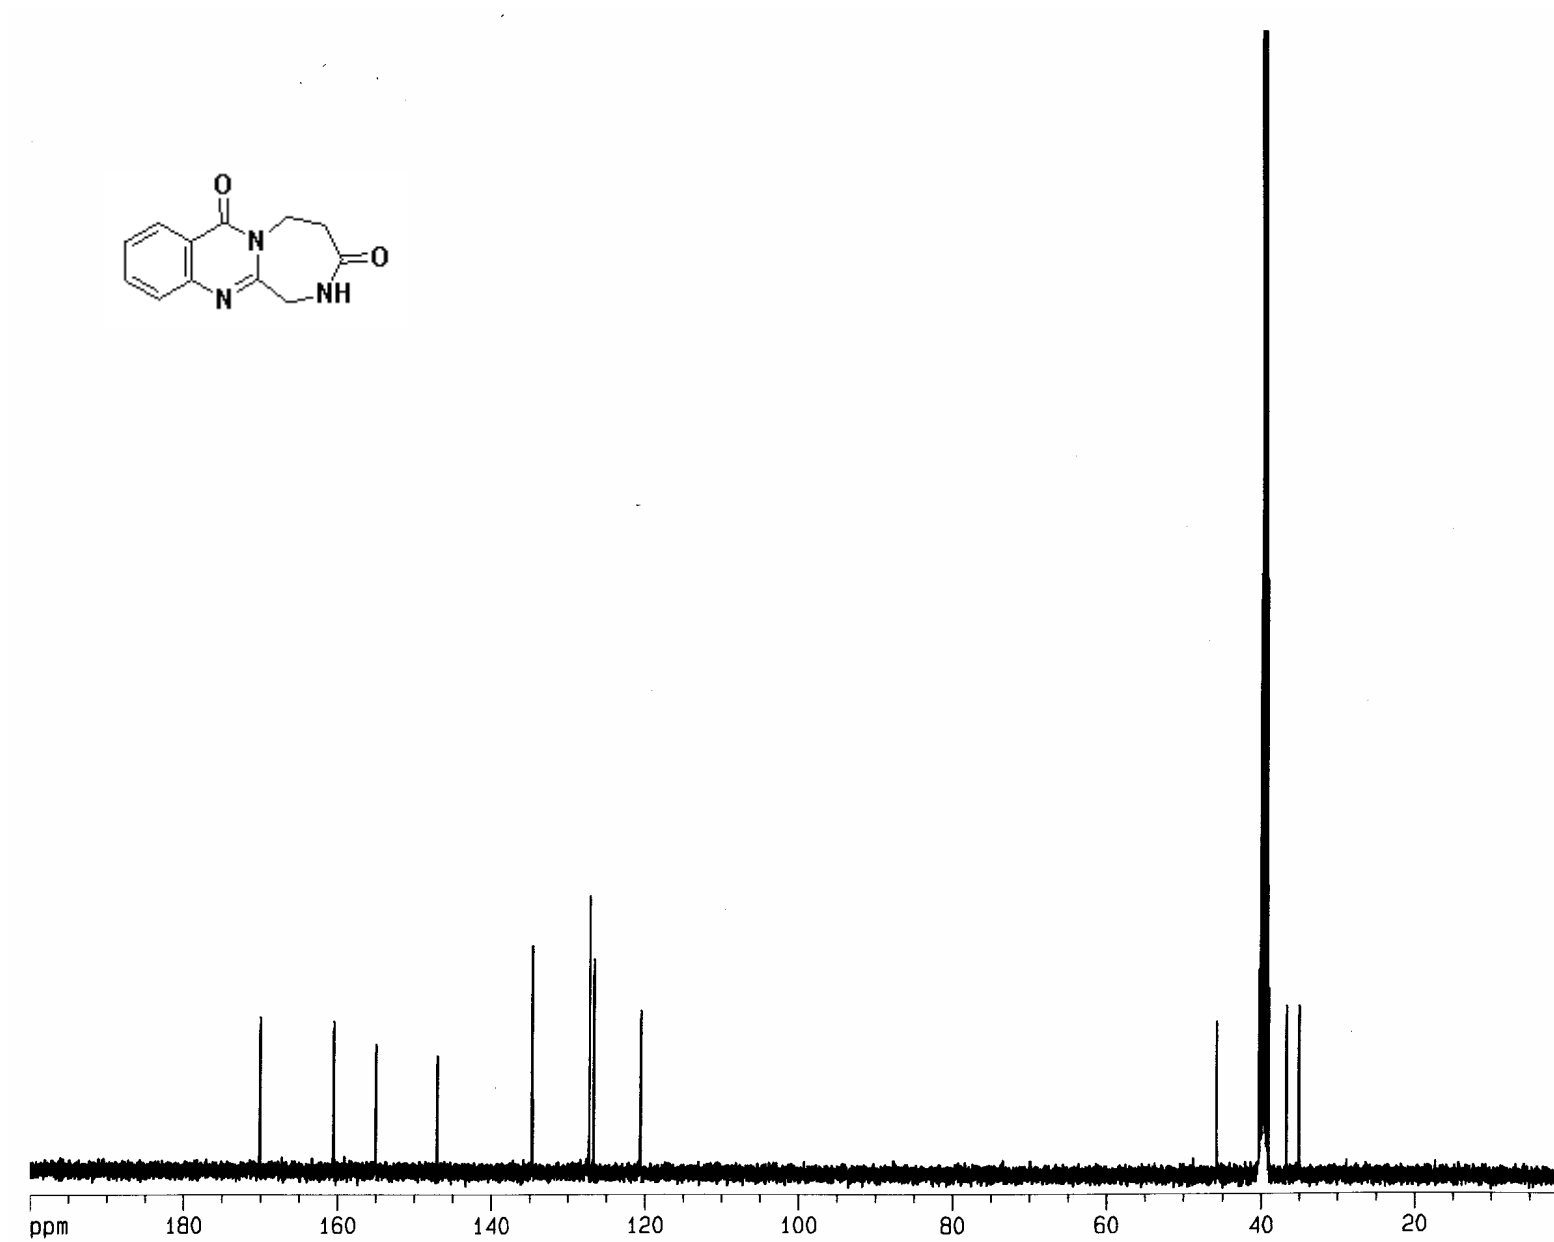

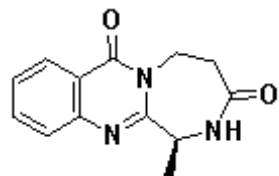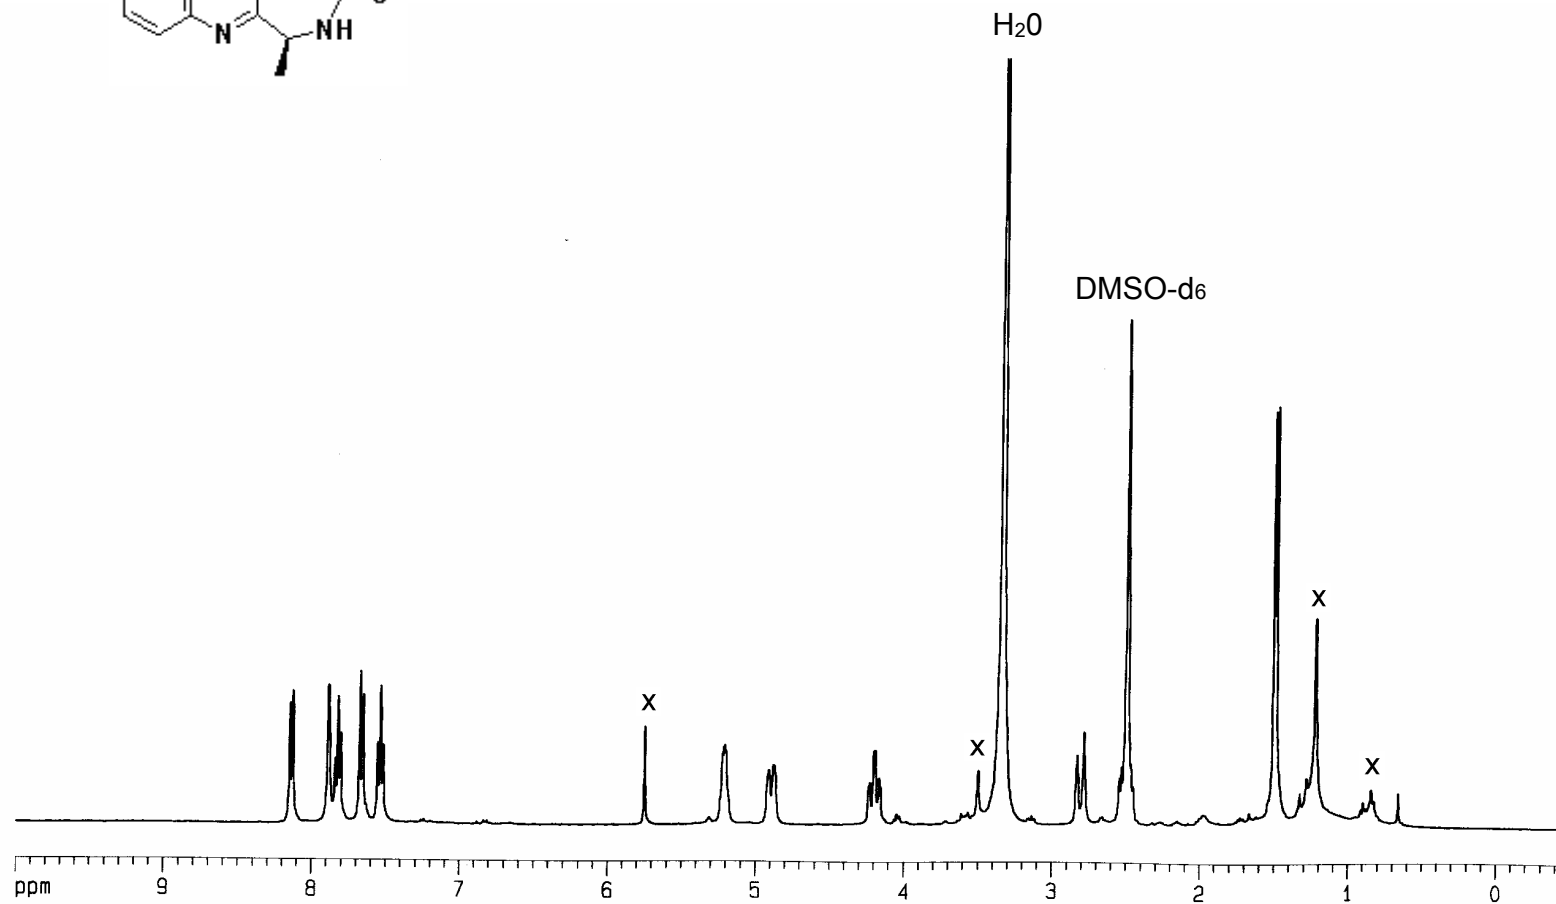

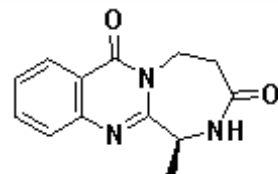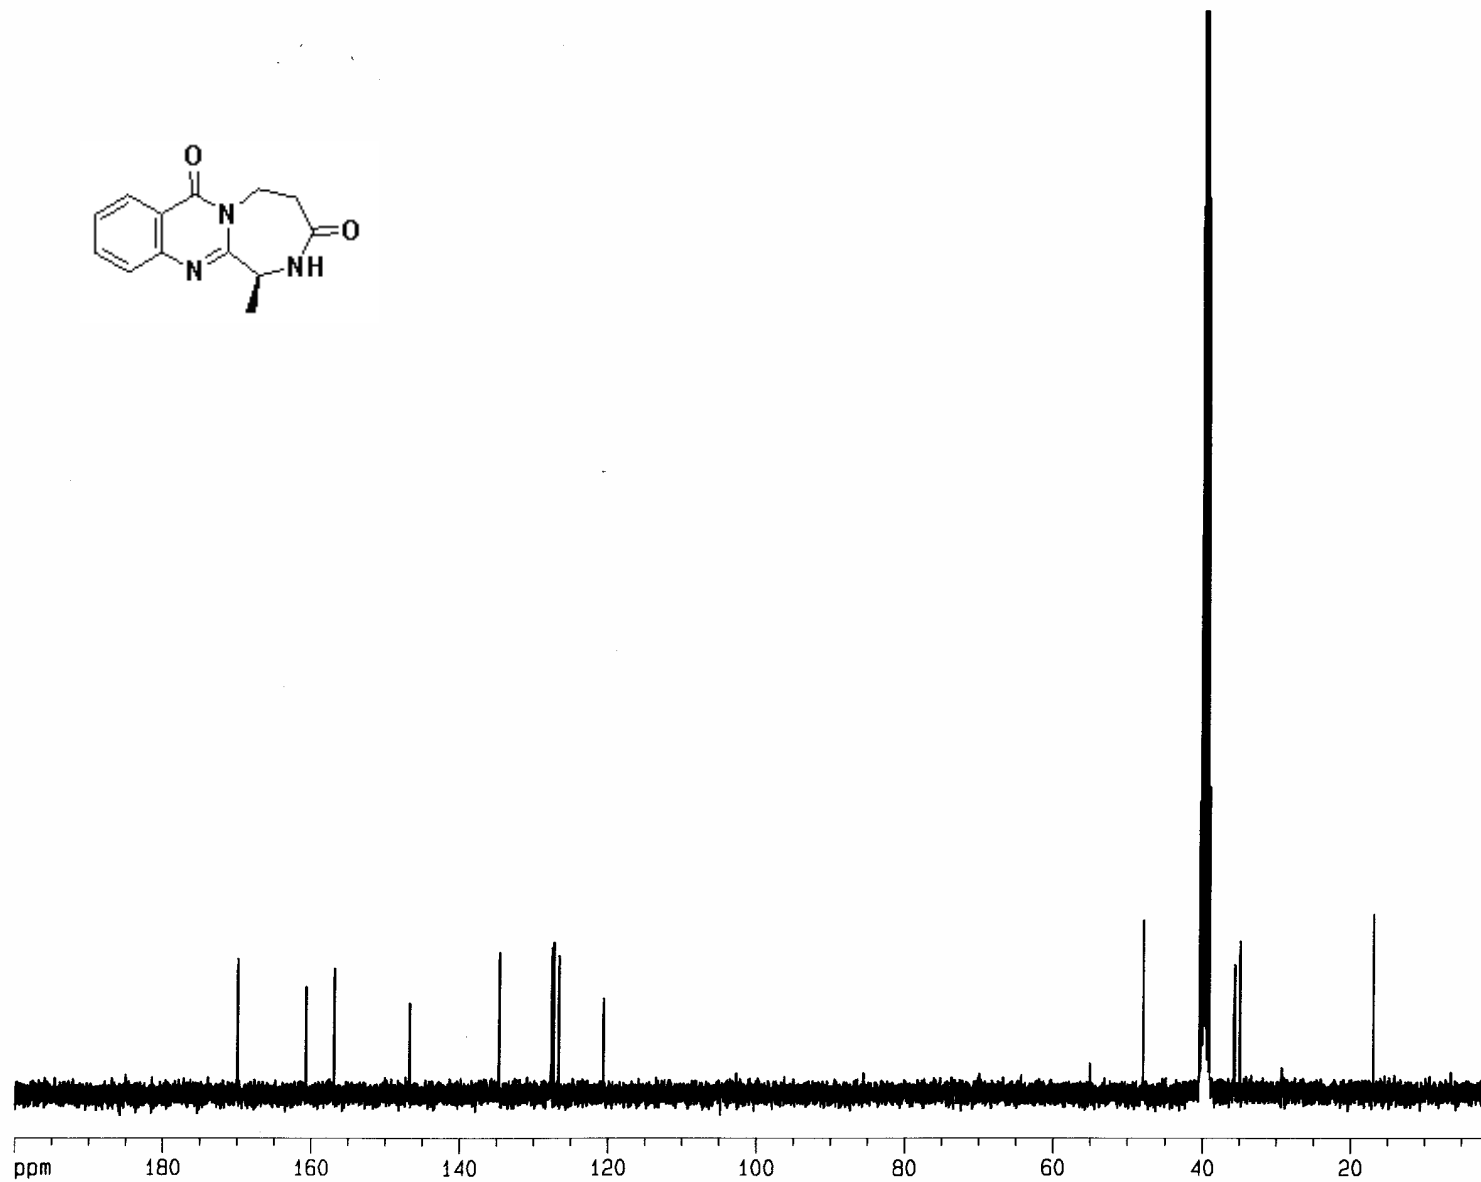

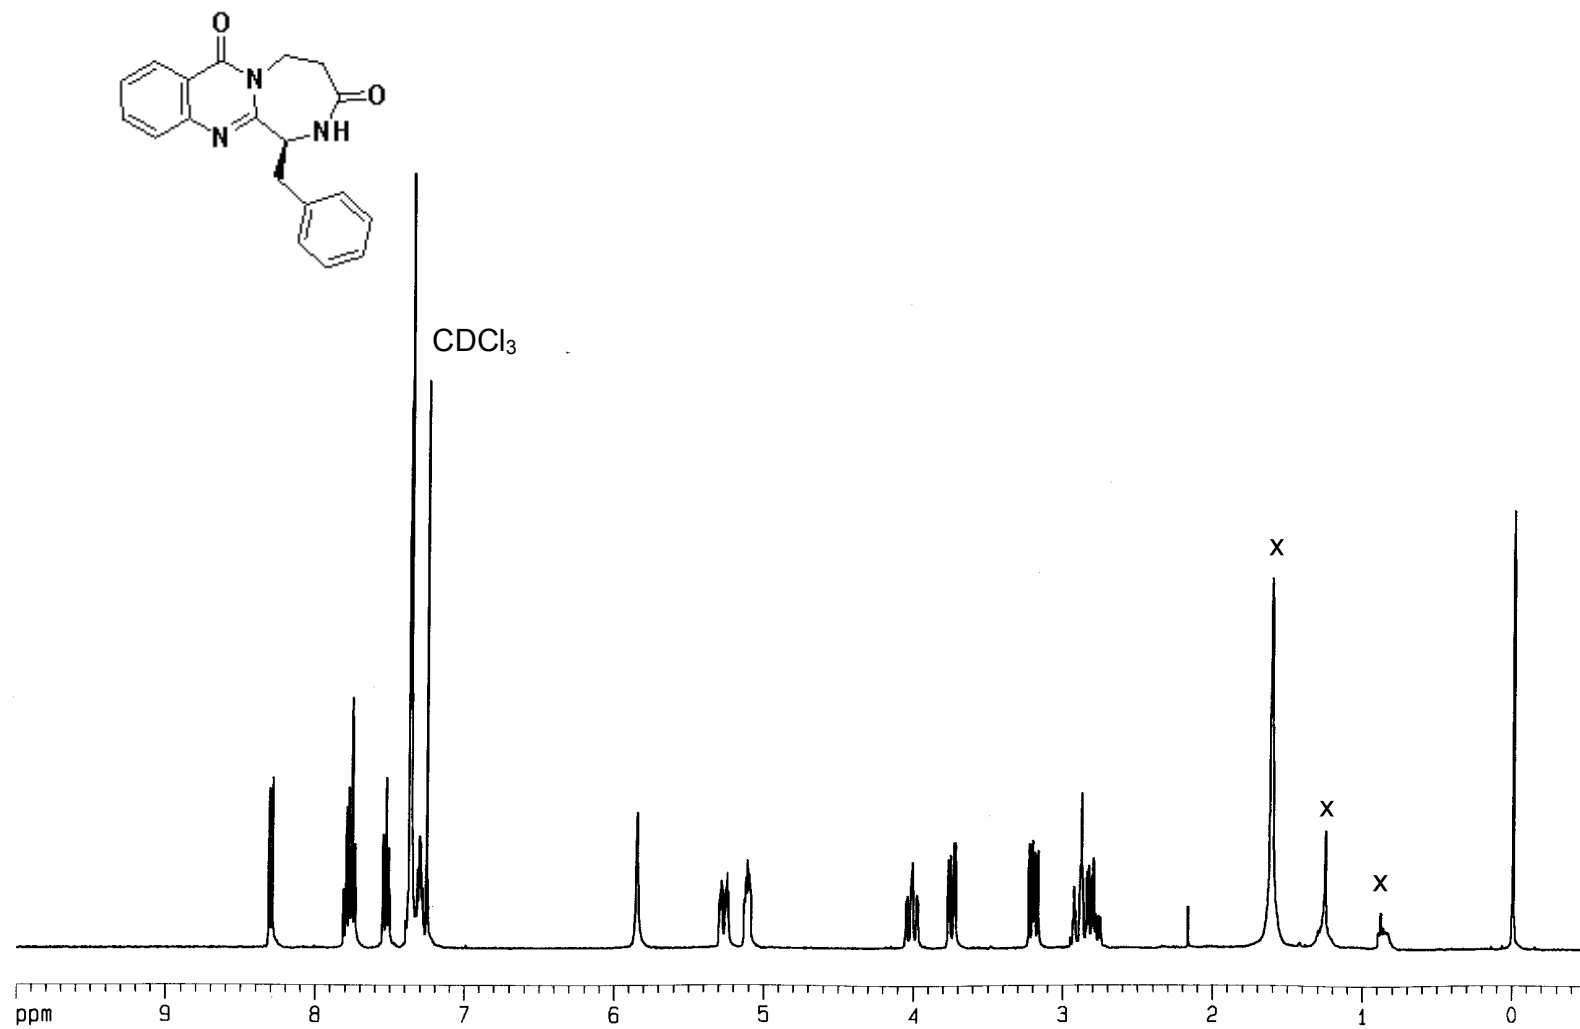

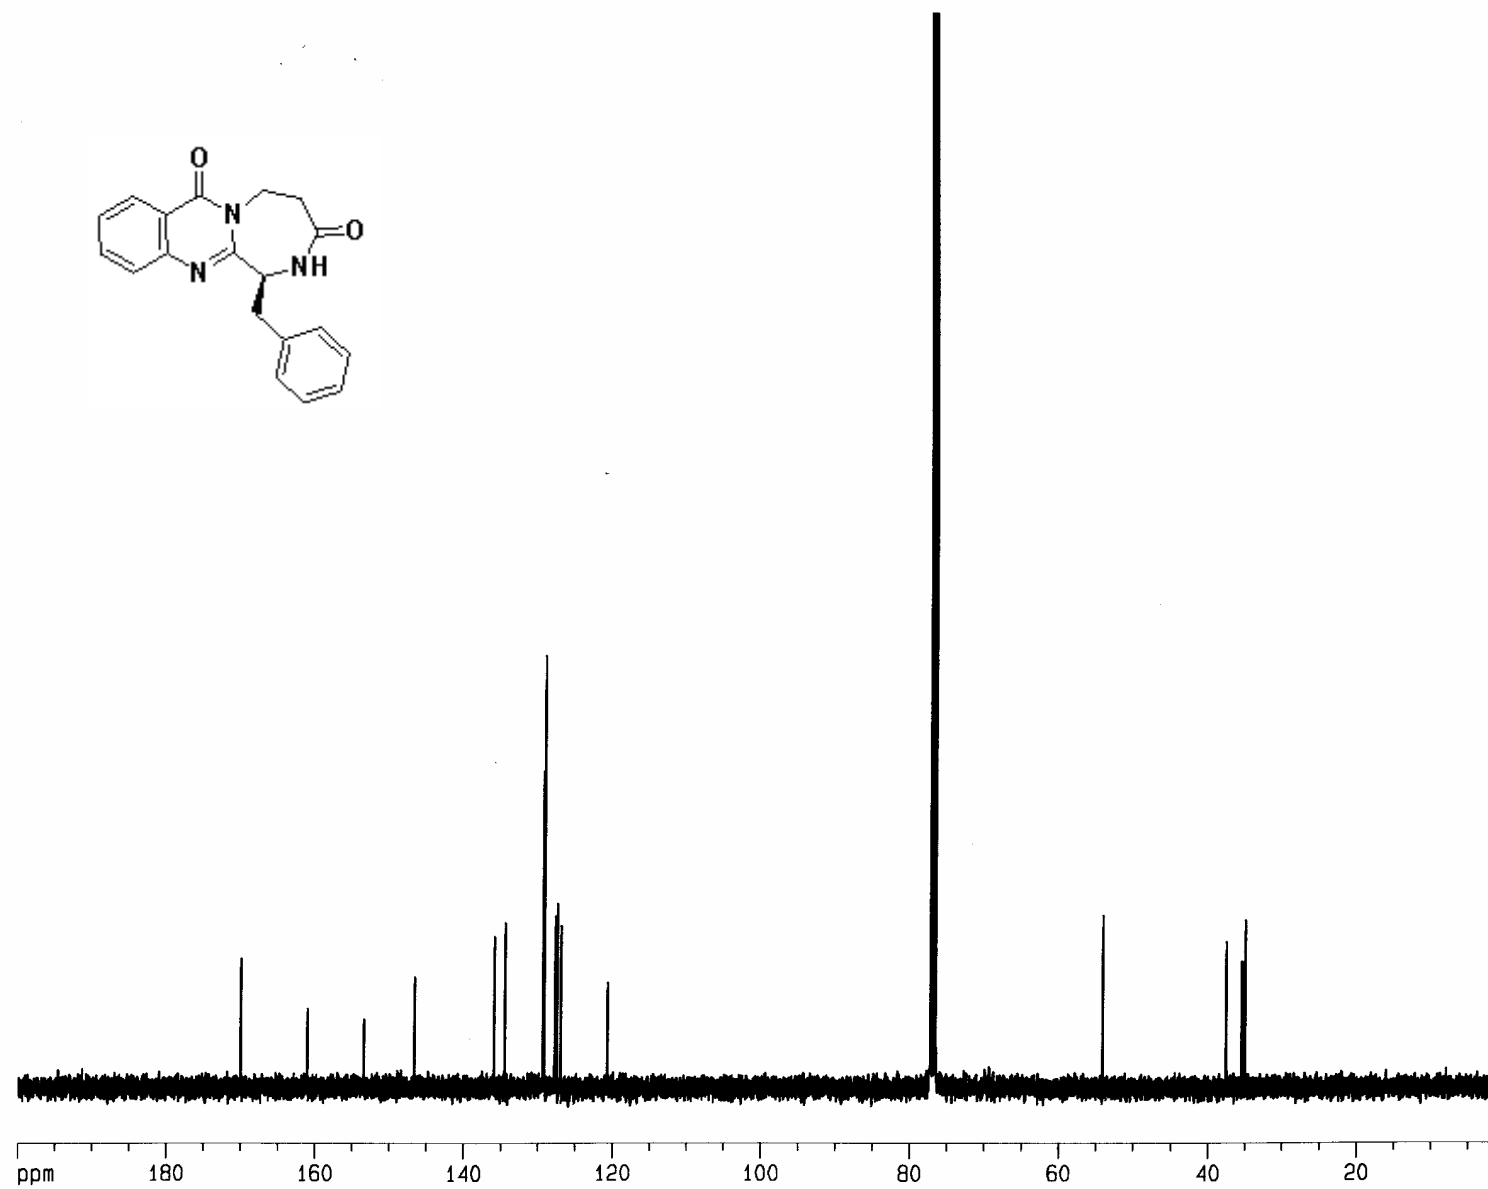

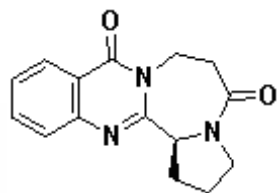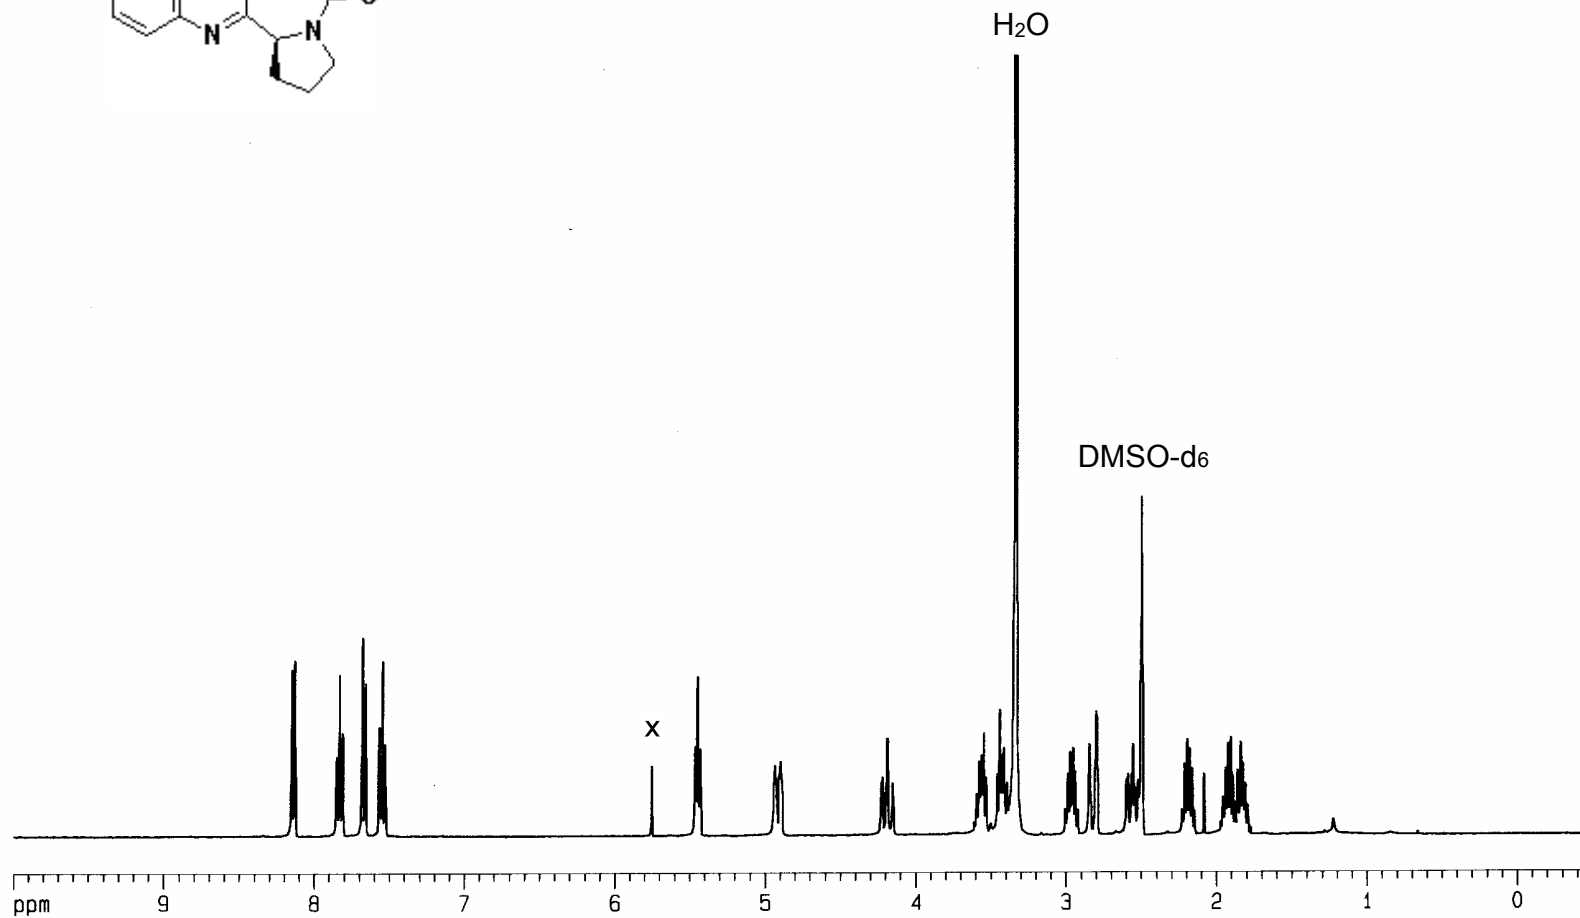

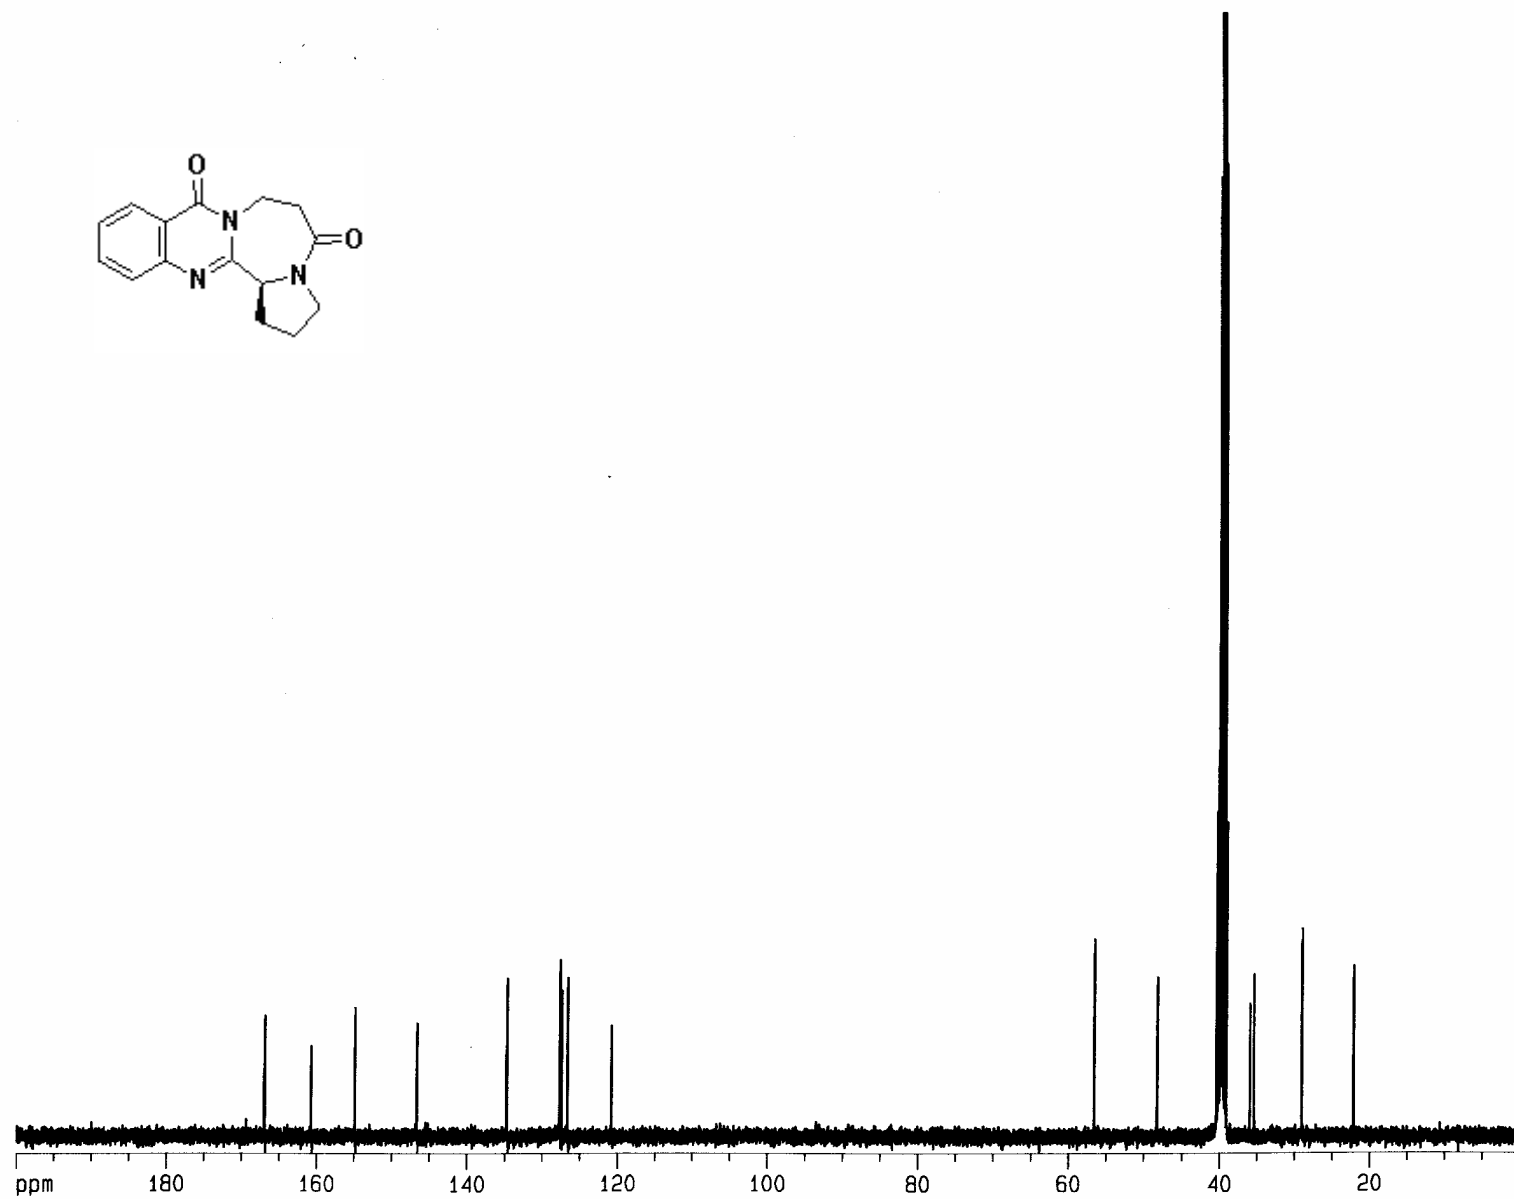

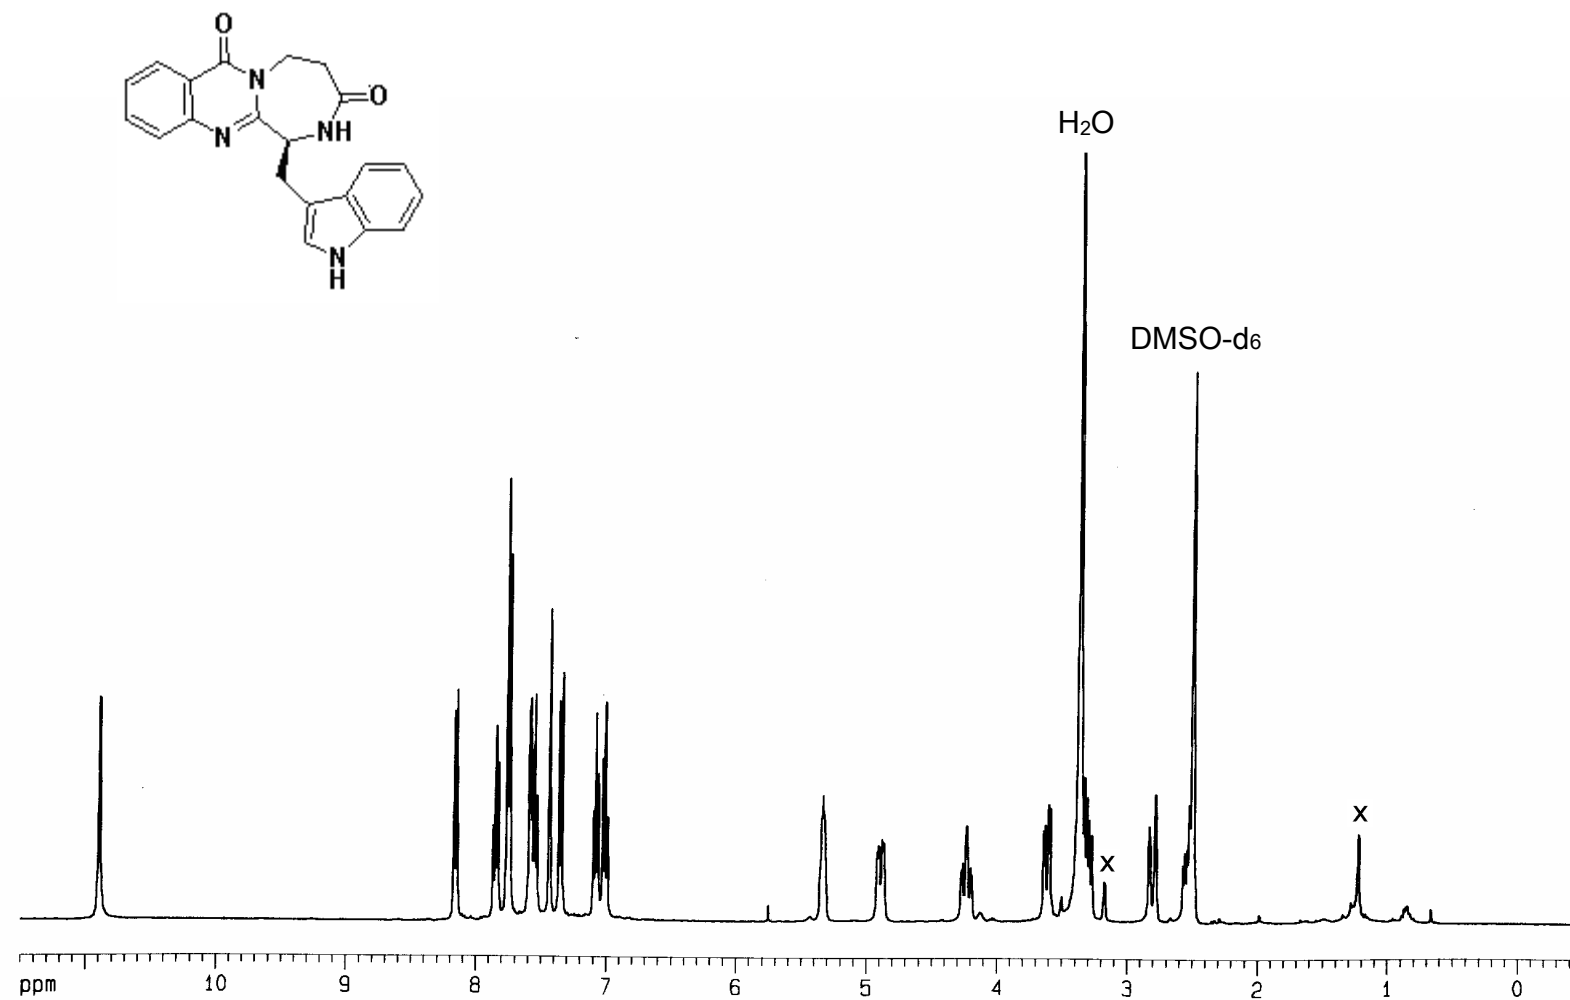

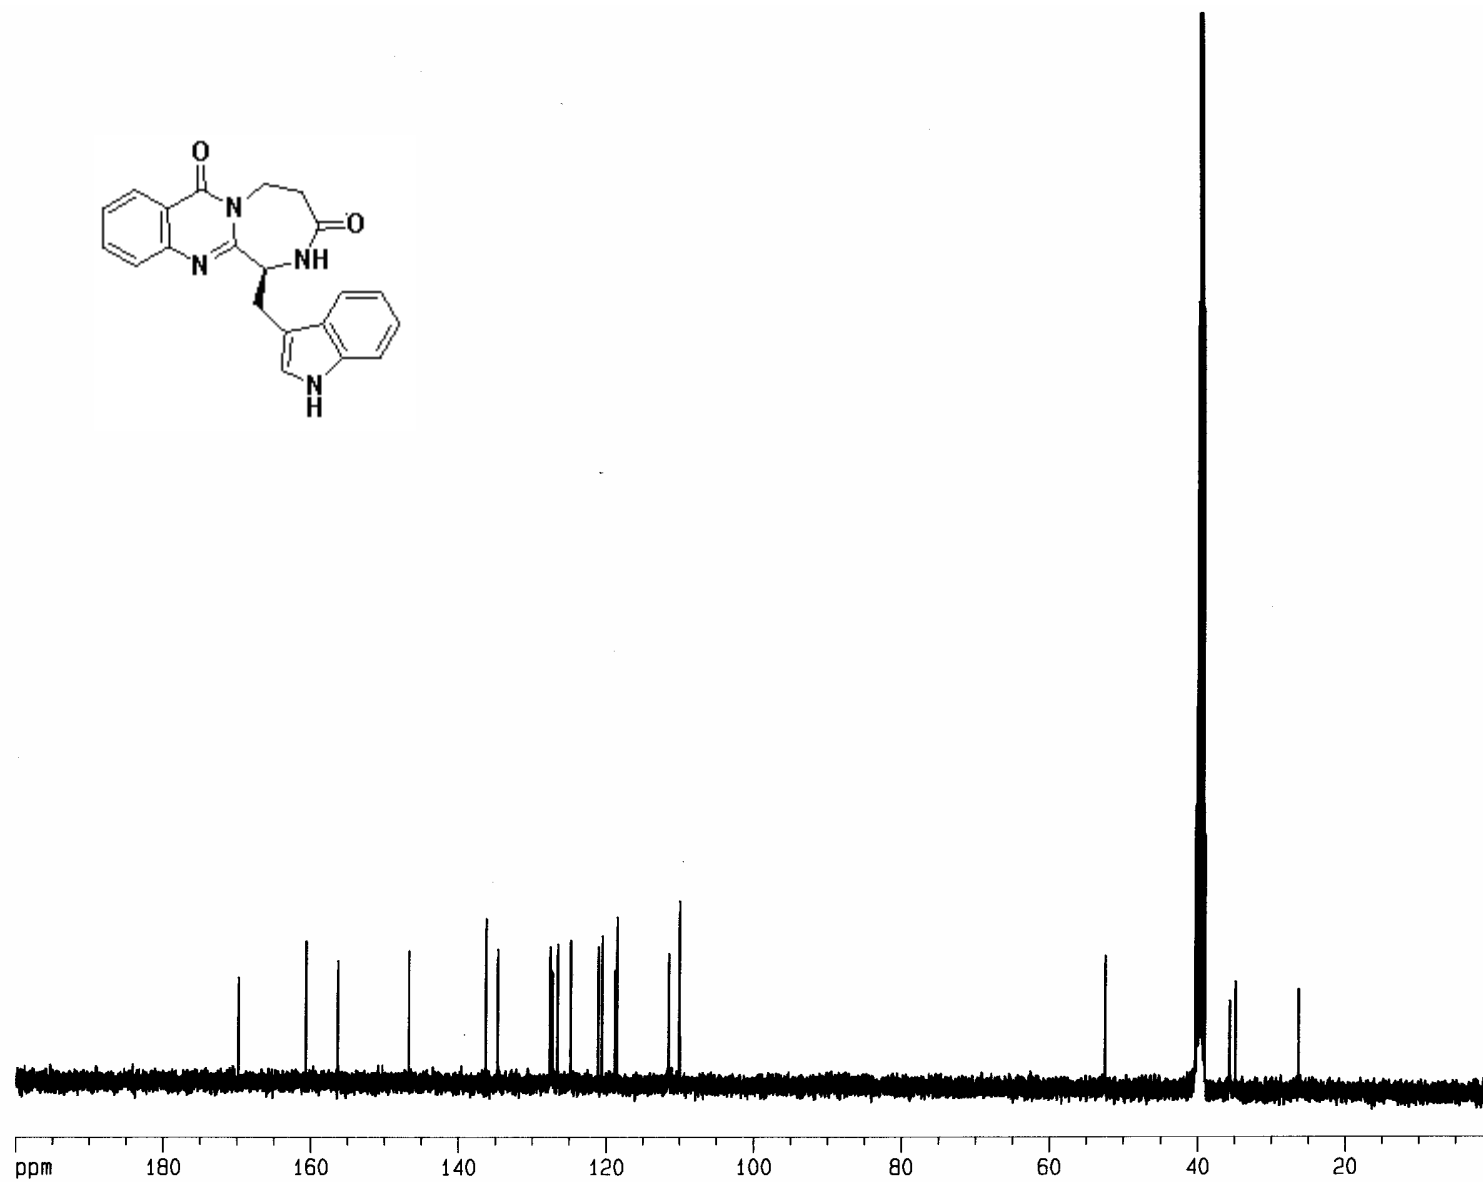

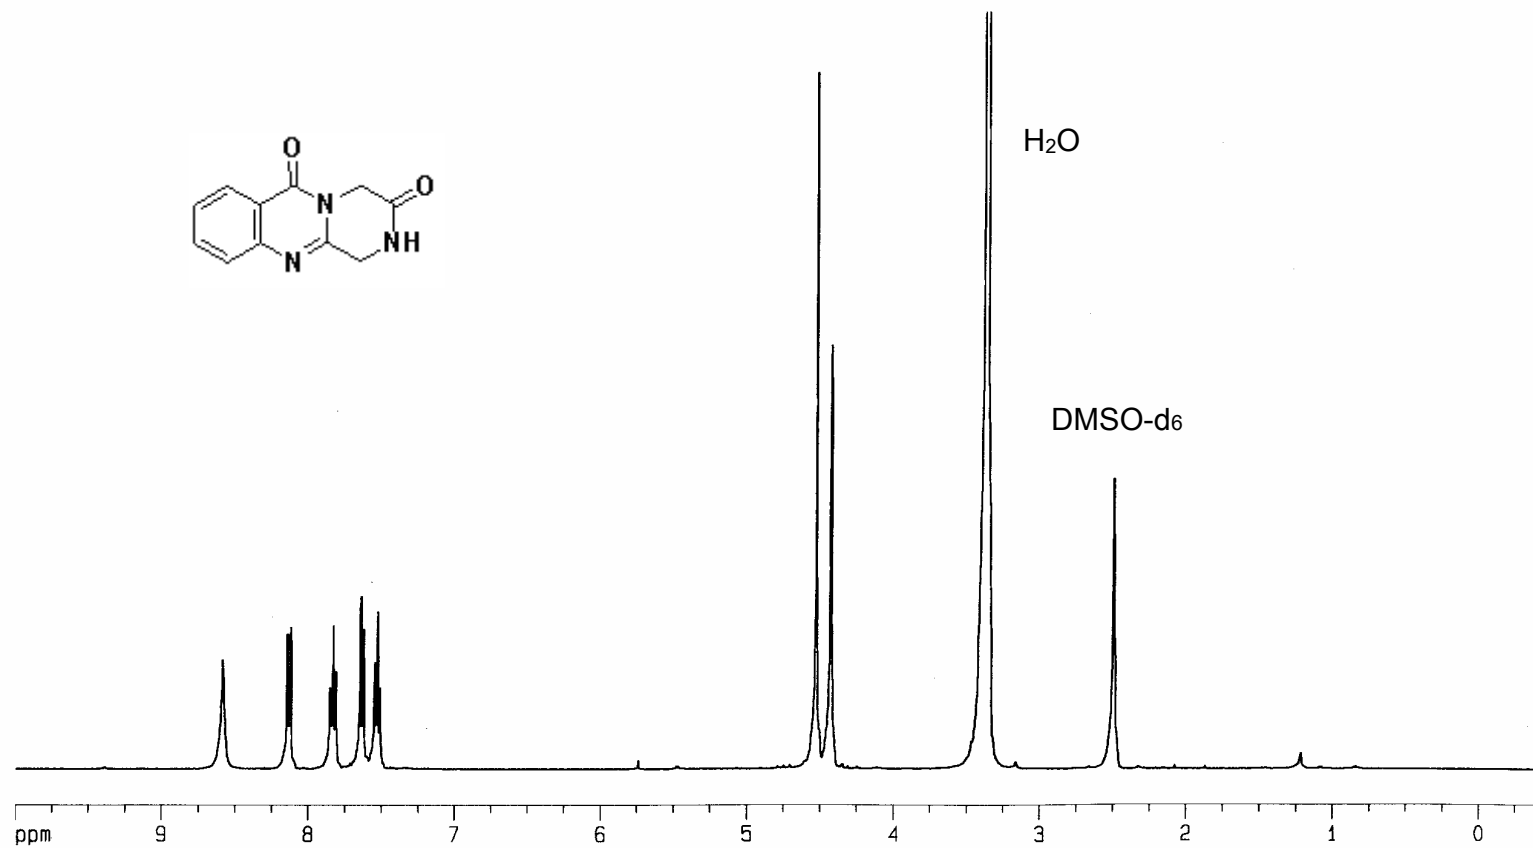

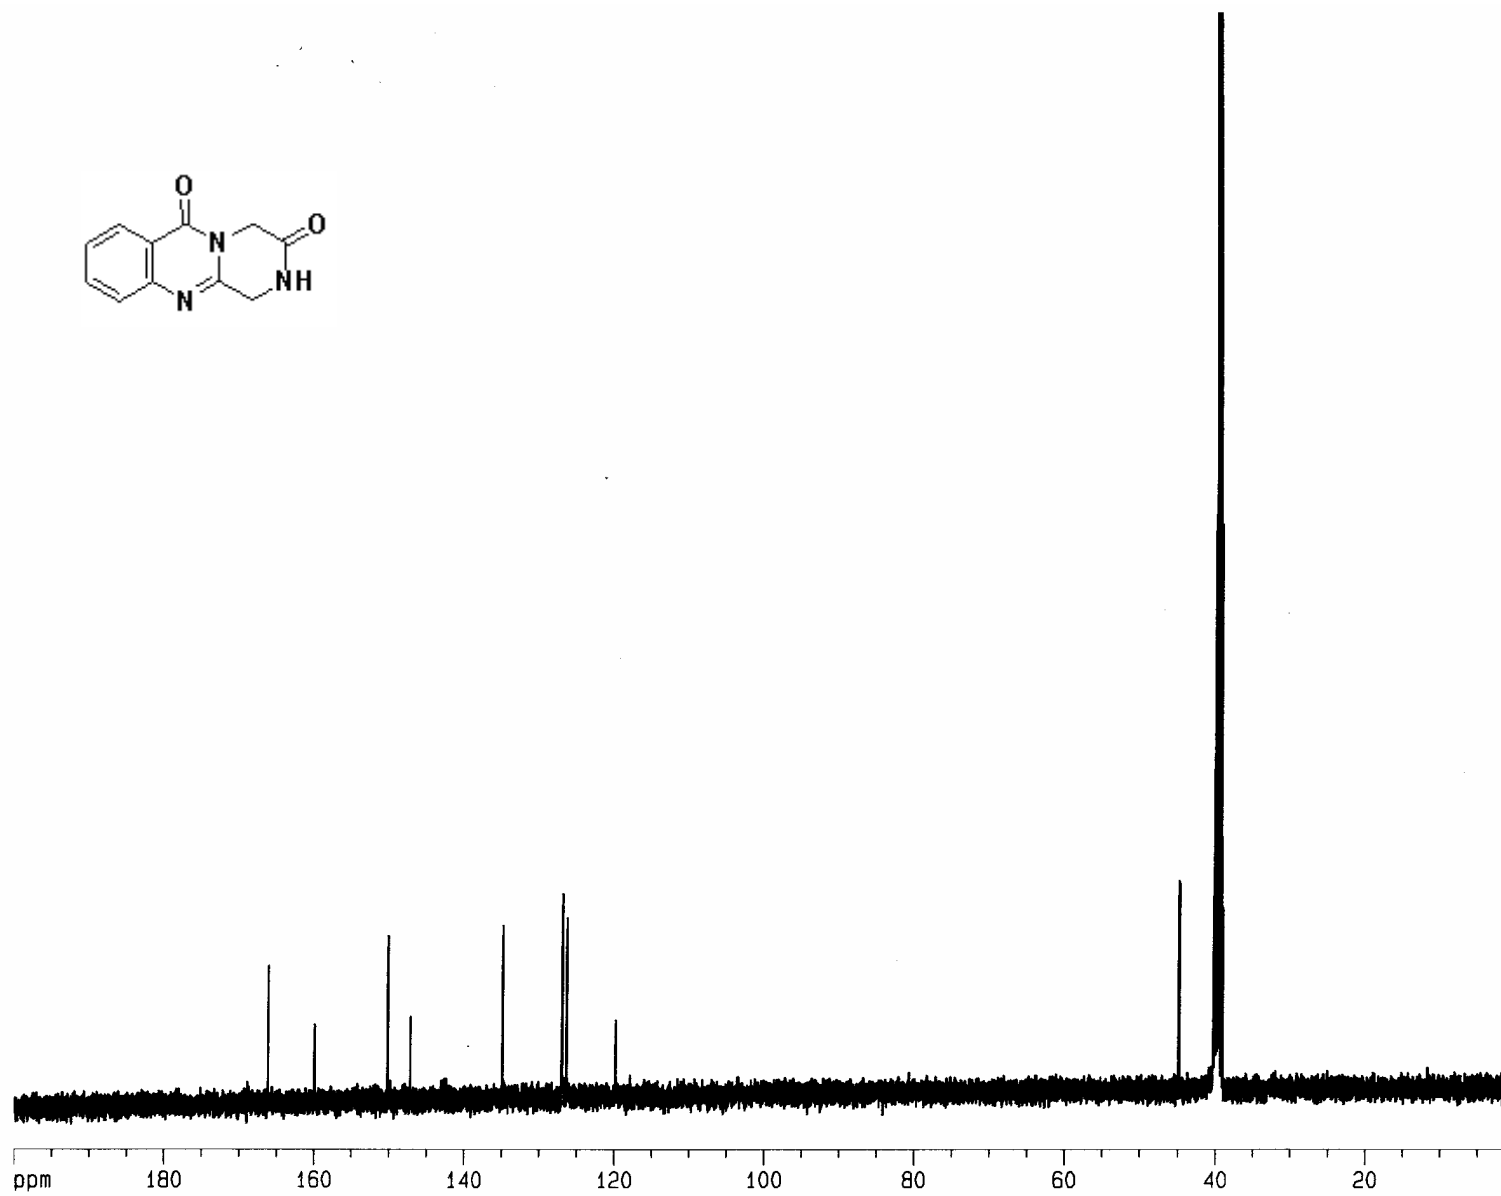

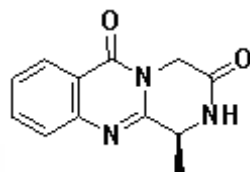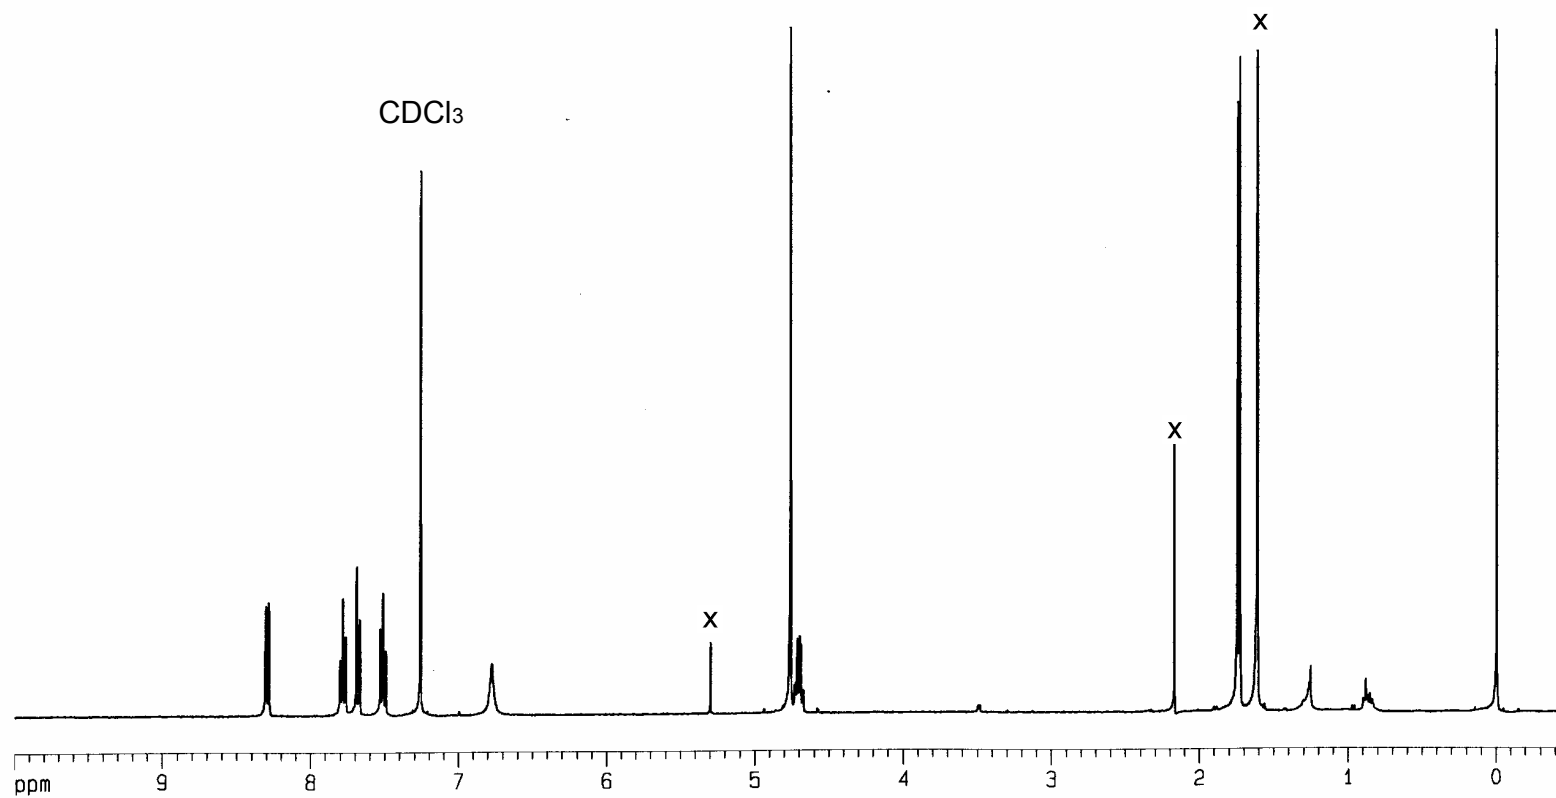

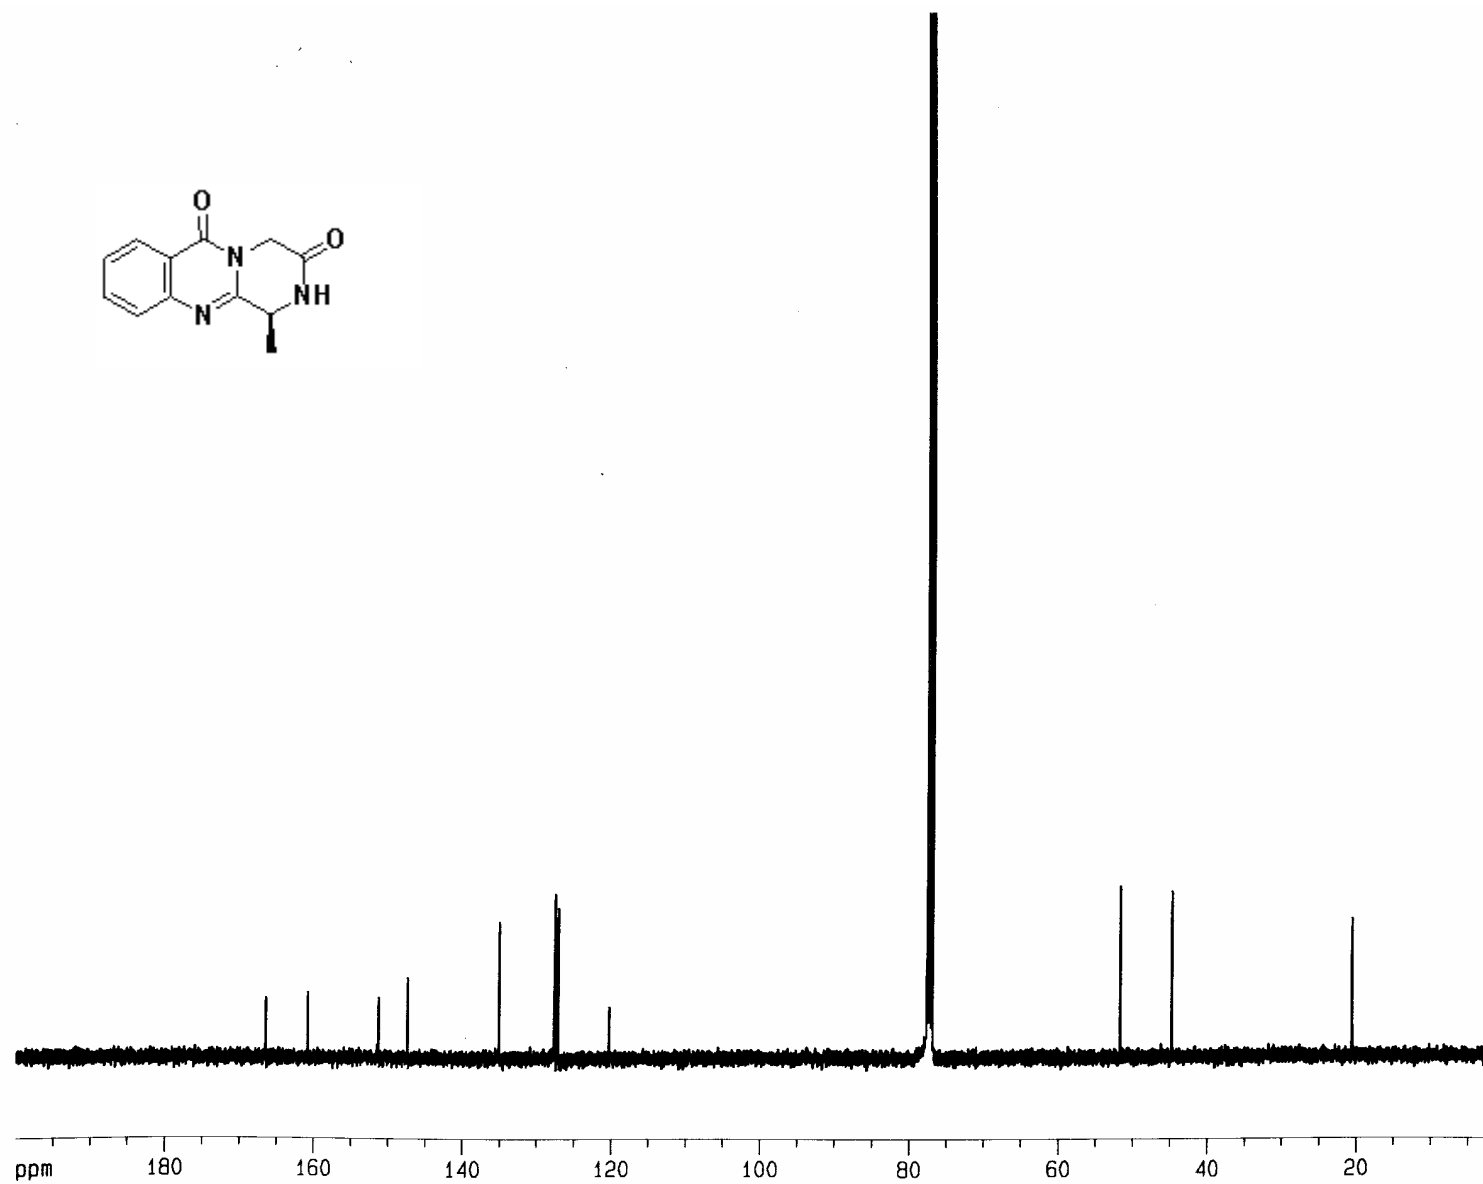

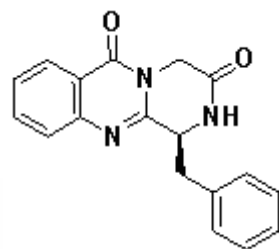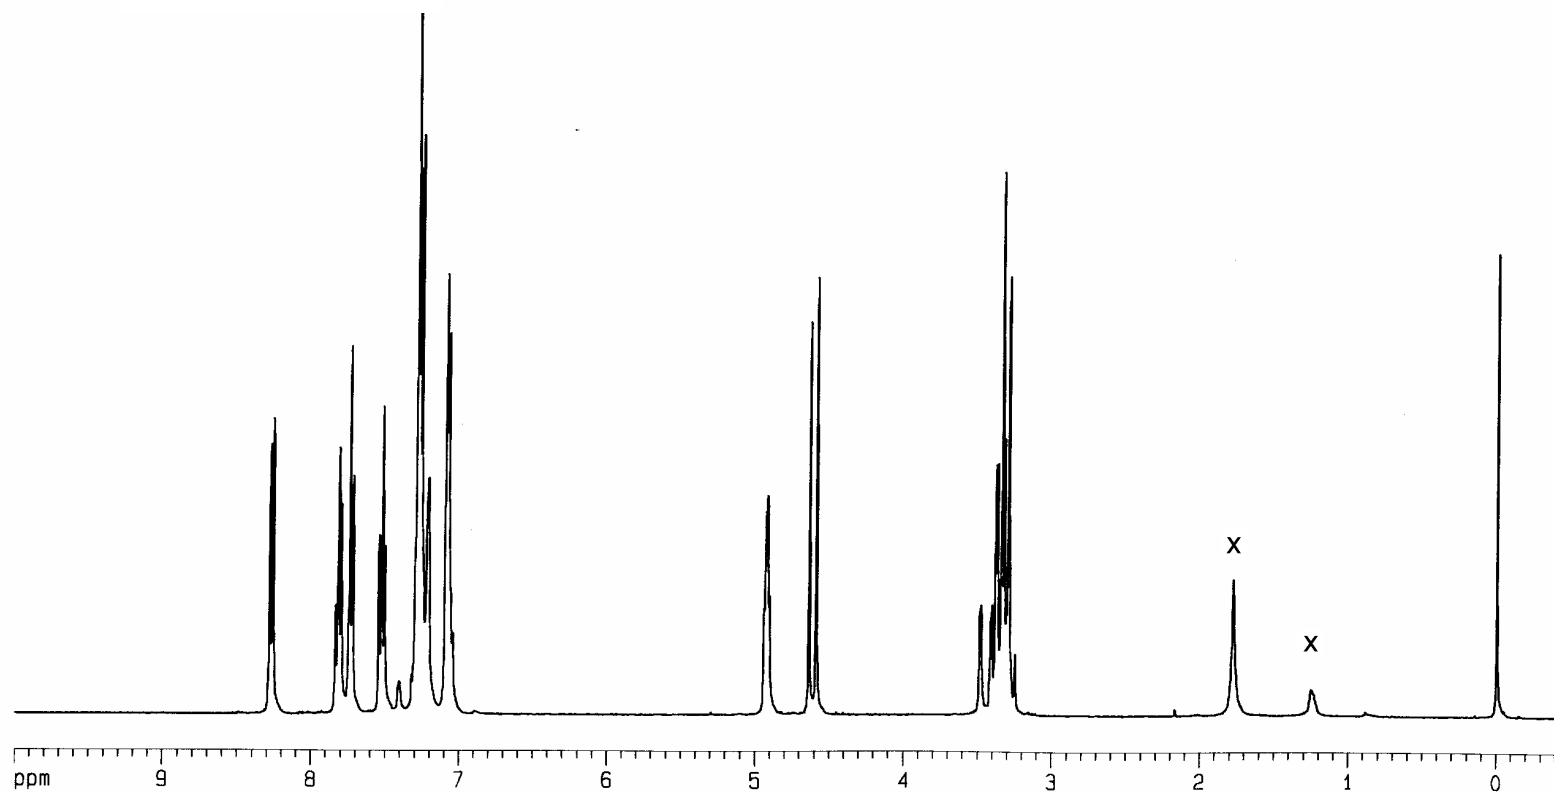

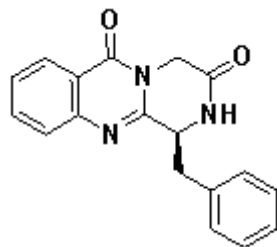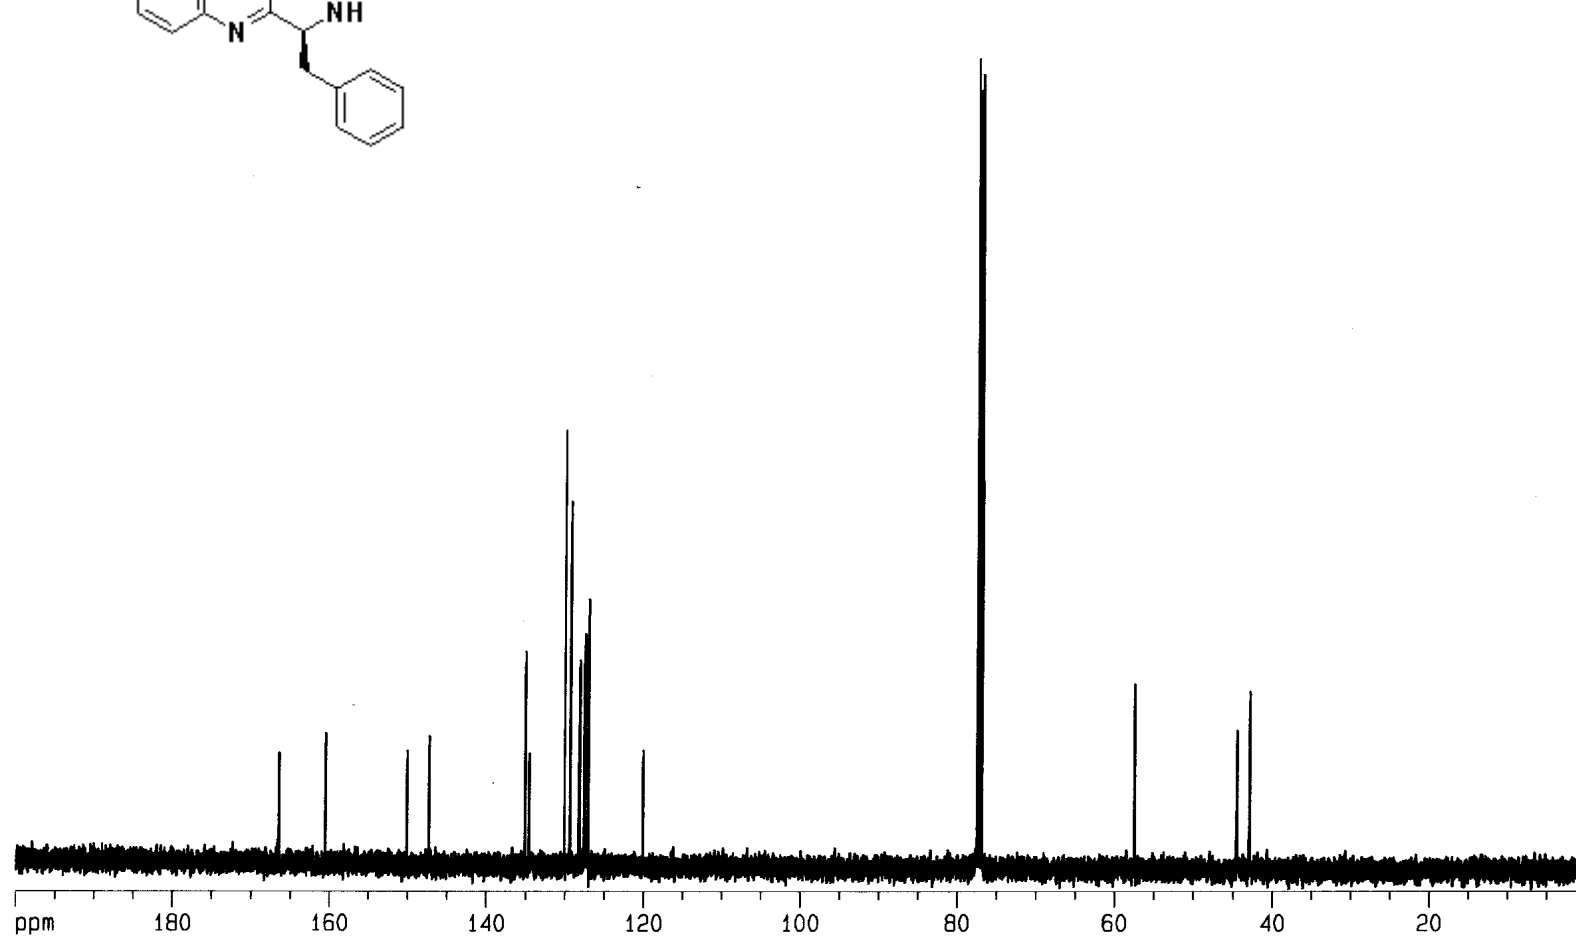

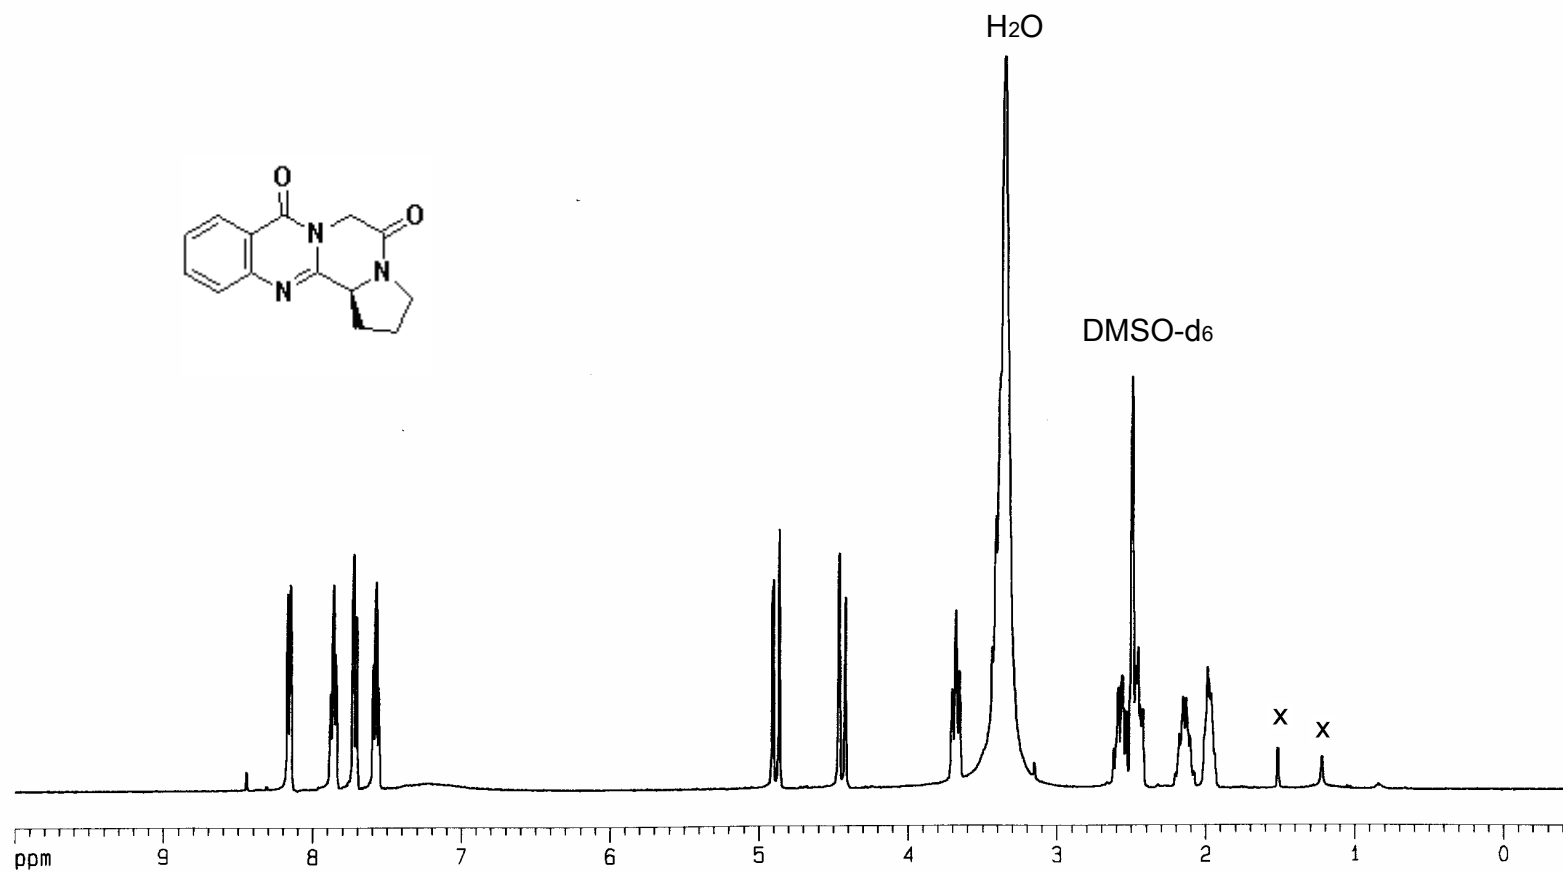

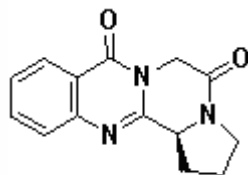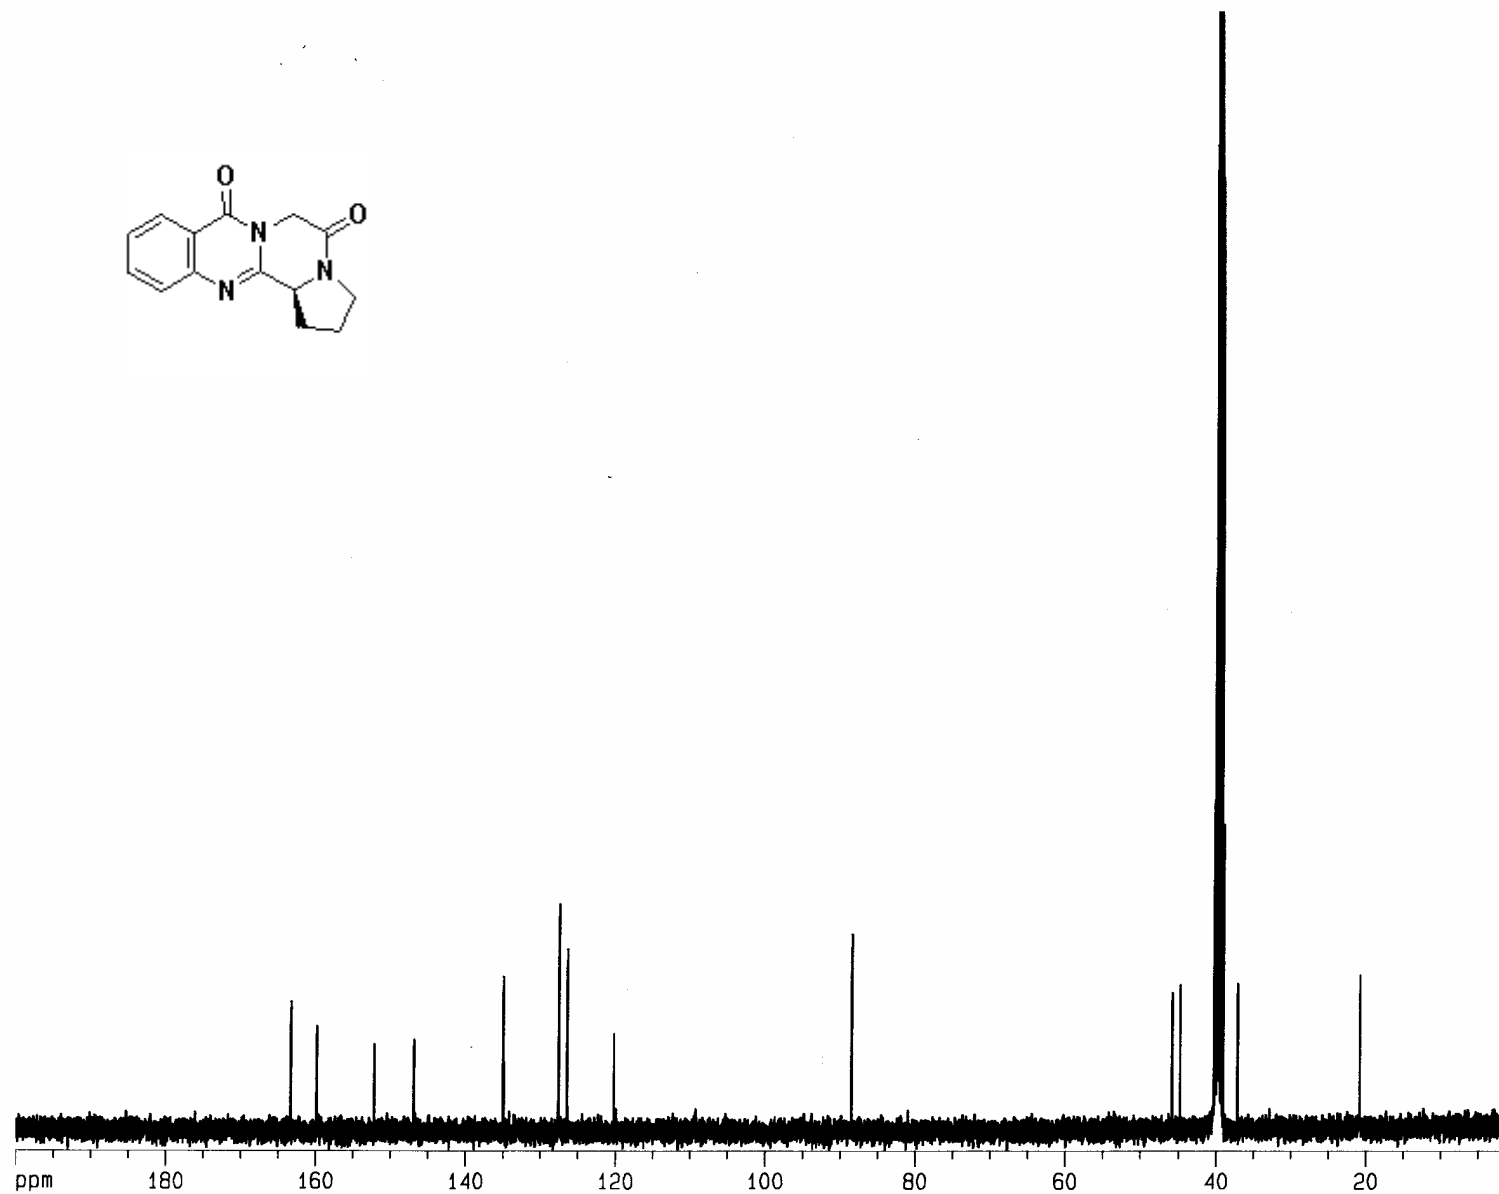

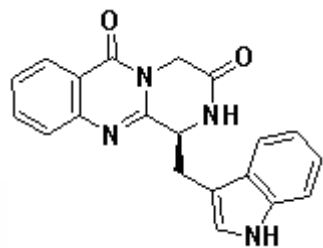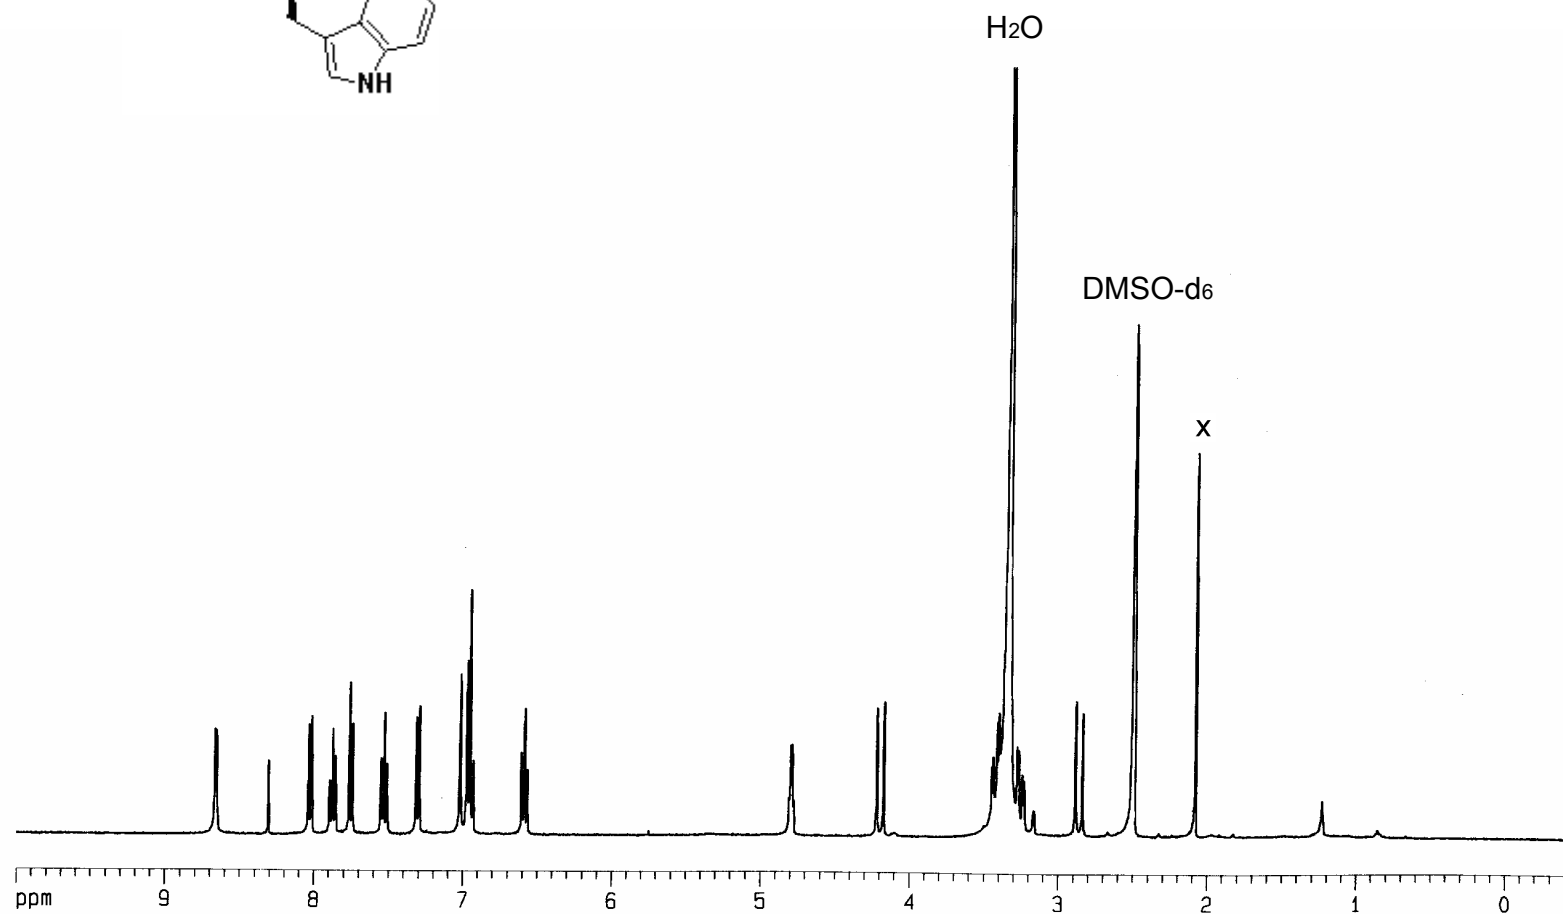

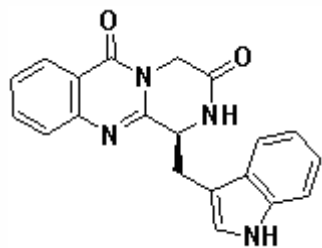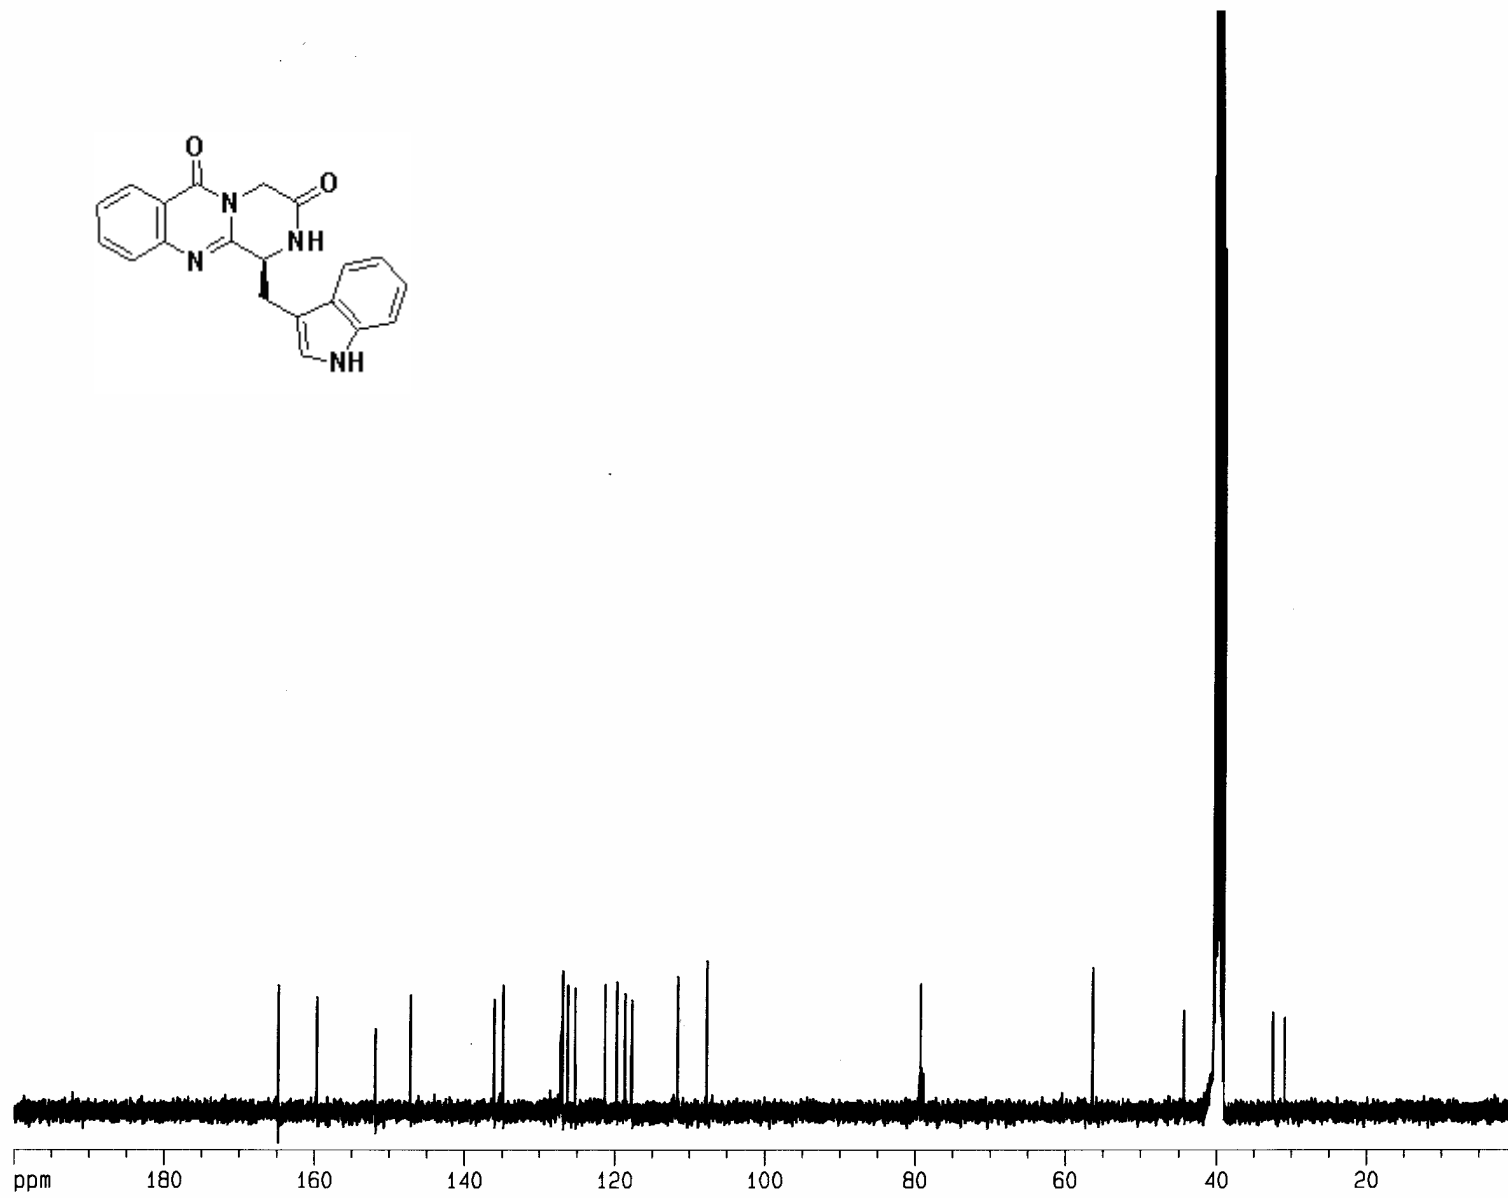

Supplement: b910545j.pdf [file b910545j.pdf]
